# Supplementary material for: Diet, life-style and cardiovascular morbidity in the rural, free living population of Elafonisos island
Source: BMC Public Health. 2017 Feb 1;17:147. doi: 10.1186/s12889-017-4053-x (PMC5286858; doi:10.1186/s12889-017-4053-x)
Supplement: Additional file 2: — PERSEAS population raw data. (XLSX 194 kb) [file 12889_2017_4053_MOESM2_ESM.xlsx]

## Sheet: Φύλλο1
name	gender	age	menopause	menopause years	sleep time	noon sleep	snoring	education	smoking	years stopped	cigarettes per day	year started	years smoking	alcohol	cereal	potato	fruit	vegetables	legumes	fish	red meat	poultry	dairy	olive oil	cheese	sweets	acivity	type	frequency	fh ah	fh stroke	fh MI	fh lipids	fh DM	fh obese	fh smoking	ah	lipids	DM	CAD	stroke	PAD	AF	Other	AH tx	ACE-i	ARB	CCB	BB
132	0	15			12	1	1	1	2		50	1980	32	3	1	2	2	0	2	4	4	0	0	5	2	0	0			4	1	0	4	1	0	6	0	0	0	0	0	0	0	0
3049	0	23			12	1	0	0	2		20			0	1	2	3	3	2	3	2	3	3	5	3	3	1	1	0	2	0	0	0	0	0	6	0	0	0	0	1	0	0	1
2080	0	37			12	1	1	1	2		20	1992	21	5	0	2	0	3	2	3	1	1	1	5	1	1	3	1	0	4	0	0	4	0	0	7	0	0	0	0	0	0	0	1
2090	0	55			12	1	1	1	2		35	1973	40	0	0	1	1	1	2	2	0	3	0	5	1	0	3	1	0								0	0	0	0	0	0	0	1	1		0
2100	0	58			12	1	1	0	2		25	1985	30	5	0	2	4	2	3	2	0	2	0	5	1	3	1	1	0	7	0	2	0	0	0	5	1	0	0	0	0	0	0	1	4				9
2081	1	58	1	4	12	1	1	1	2		20	1970	43	0	0	4	4	3	3	2	2	1	0	5	3	2	3	1	0								1	1	0	0	0	0	0	1	8		12
117	1	59	1	10	12	1	1	0	2		10		20	0	1	0	0	0	1	3	2	2	2	5	2	1	1	0	2	0	0	3	3	3	0	2	0	0	0	0	0	0	0	0
3071	0	27			11	1	0	3	2		15	2007	7	0	0	1	3	1	2	3	2	2	1	5	2	2	1	1	2	0	0	0	0	0	0	2	0	0	0	0	0	0	0	0
237	0	45			11	1	0	2	2		90	1987	25	3	1	2	2	1	2	2	3	2	2	5	3	2	0			0	0	0	0	0	0	3	0	0	0	0	0	0	0	1
3105	0	45			11	1	0	3	2		20		30	5	3	2	2	2	2	2	2	2	0	5	4	1	1	0	2	0	0	0	0	1	0	3	0	0	0	0	0	0	0	0
3080	0	57			11	1	1	2	2		4	1975	39	4	0	2	3	3	2	2	3	2	2	5	2	2	1	1	2	7	2	0	5	0	0	0	0	0	0	0	0	0	0	0
2032	1	27			10	1	0	3	2		30		13	0	2	1	3	3	2	2	3	4	3	5	2	0	2	1	0	4	0	2	4	1	0	4	0	0	0	0	0	0	0	0
3045	0	35			10	1	1	3	2		20	1998	16	5	0	2	1	2	2	2	3	3	0	5	3	1	3	1	0	1	0	1	0	0	1	4	0	0	0	0	0	0	0	0
137	0	39			10	1	1	2	2		20		7	0	1	2	0	2	2	3	2	2	2	5	1	0	1	1	2	2	0	0	0	2	0	6	0	0	0	0	0	0	0	1
2074	0	40			10	1	1	3	2		35			5	0	2	0	3	1	3	1	2	0	5	2	1	3	1	0	0	0	0	0	0	0	6	0	1	0	0	0	0	0	1
2045	0	41			10	1	0	3	2		10			0	0	2	1	1	3	1	1	1	0	5	1	4	0			0	0	0	0	0	0	0	0	0	0	0	0	0	0	0
120	1	41	0		10	1	0	3	2		7	1991	21	0	0	1	0	2	1	2	2	3	1	5	2	4	2	1	1	0	0	2	1	3	2	2	0	0	0	0	0	0	0	1
203	0	57			10	1	0	0	2		20		37	5	0	1	0	0	1	2	1	2	0	5	1	0	0			0	0	0	0	0	0	2	0	0	0	0	0	0	0	1
289	0	60			10	1	1	1	2		10		10	5	1	1	1	2	3	4	2	2	0	5	2	3	1	1	0	0	0	0	3	1	0	6	0	1	0	0	0	0	0	0
110	1	24	1		9	1	0	3	2		7	2002	11	0	1	2	2	2	1	4	2	2	0	5	2	1	1			2	0	0	0	0	4	0	0	0	0	0	0	0	0	0
2096	0	27			9	1	0	3	2		40	2004	9	3	0	2	0	0	2	1	2	1	0	5	1	0	1	1	1	0	0	0	0	0	0	6	0	0	0	0	0	0	0	0
134	0	36			9	1	1	3	2		20	1997	15	0	0	1	1	1	2	3	2	2	0	5	1	4	0			0	0	0	1	1	0	0	0	0	0	0	0	0	0	0
3114	0	44			9	1	1	1	2		40		30	3	0	3	0	1	3	3	3	1	0	5	2	1	1	1	1	1	0	0	1	1	0	6	0	0	0	0	0	0	0	0
3039	1	48			9	1	1	0	2		20	1994	20	0	0	2	1	3	2	0	2	2	0	5	3	4	1	1	0								0	0	0	0	0	0	0	0
2108	1	48	0		9	1	1	0	2		20	1985	28	0	1	1	3	3	2	4	1	2	0	5	2	2	1	1	0	0	0	1	0	0	0	6	0	0	0	0	0	0	0	0
2105	0	53			9	1	1	0	2		50	1975	35	0	0	2	1	0	2	5	2	2	0	5	1	1	1	1	0	4	0	0	1	4	0	6	0	0	0	0	0	0	0	0
2071	0	56			9	1	0	0	2		20			0	0	2	0	1	2	5	2	2	0	5	1	0	2	1	0	0	0	0	0	0	0	6	1	0	1	0	0	0	0	1	8		12
41	0	59			9	1	1	1	2		45	1973	40	3	0	1	0	2	2	3	2	1	0	5	2	1	0			6	2	0	6	2	6	6	1	1	0	0	0	0	0	1
14	1	60	1	5	9	1	1	3	2		20	1979	33	0	3	1	4	3	2	3	2	2	0	5	3	2	0			2	2	0	1	0	1	1	1	1	0	0	0	0	0	1
182	0	72			9	1	1	1	2		20	1956	56	5	1	2	1	1	2	3	3	2	1	5	1	1	0			3	0	0	0	3	0	0	1	0	0	0	0	0	0	1
3037	0	45			9	1	1	1	2		1	1985	29	3													1			2	2	0	4	0	0	0	0	1	0	0	0	0	0	0
3086	1	51	1	1	9	1	1	2	2		20	1983	31	0	1	1	3	2	2	1	2	2	0	5	0	5	1	1	2	7	2	0	5	1	0	6	1	1	0	0	0	0	0	0	1		1
202	0	69			9	1	1	4	2		20		40	4	0	1	1	1	1	2	3	2	1	5	2	2	0			4	2	1	0	6	0	2	1	1	0	1	0	0	0	1	21		1	0	5
306	0	21			8	1	1	3	2		20		3	4	0	2	0	1	2	2	1	2	1	5	1	1	2	1	0	0	0	0	0	0	0	3	0	0	0	0	0	0	0	0
2092	0	23			8	1	0		2		15		2	3	0	2	1	2	2	4	1	3	0	5	2	1	2	0	1	2	0	0	2	2	2	6	0	0	0	0	0	0	0	1
2022	0	28			8	1	1	3	2		40	1999	14	0	1	2	3	2	2	0	2	3	3	5	2	5	2	0	1	0	0	0	1	0	3	7	0	0	0	0	0	0	0	0
2044	1	28			8	1	0	4	2		20			5	0	0	0	3	1	0	2	3	3	5	2	2	0			0	0	0	0	2	0	2	0	0	0	0	0	0	0	1
63	1	31	0		8	1	1	4	2		20	2000	12	5	1	2	0	3	2	3	3	3	3	5	3	5	1	0	2	1	0	0	0	0	1	1	0	0	0	0	0	0	0	1
76	0	37			8	1	0	3	2		20	1992	20	4	0	1	2	2	2	2	3	2	0	5	1	2	0			0	0	0	6	0	0	3	0	0	0	0	0	0	0	0
2021	1	39	0		8	1	0	0	2		40	1999	14	0	0	1	1	3	0	2	1	5	1	5	1	4	1	1	1	1	0	0	0	1	0	6	0	0	0	0	0	0	0	0
254	0	40			8	1	1	3	2		40	1993	19	5	0	1	1	2	1	3	3	2	0	4	2	3	2	0		2	0	0	0	0	1	0	0	0	0	0	0	0	0	0
276	0	43			8	1	0	3	2		30	1989	23	5	1	1	2	2	2	2	1	2	3	5	1	2	0			2	0	0	4	2	0	6	0	0	0	0	0	0	0	0
2079	0	43			8	1	0	3	2		25		20	5	0	2	0	0	1	1	2	2	1	5	0	2	2	0	0	1	0	0	0	0	0	2	0	0	0	0	0	0	0	0
2033	1	43			8	1	0	3	2		20			5	3	2	2	3	2	4	2	2	3	5	2	2	1	1	0	4	2	0	0	0	0	6	0	1	0	0	0	0	0	0
153	0	44			8	1	1	3	2		40		10	0	1	2	2	1	2	3	0	2	2	5	2	5	1	1	1	4	1	0	0	1	0	2	0	0	0	0	0	0	0	1
138	0	44			8	1	1	1	2		20		20	0	2	1	0	2	1	3	3	3	1	5	2	1	1	1	2	4	2	0	1	0	0	0	0	0	0	0	0	0	0	1
2025	1	44			8	1	1	3	2		1	2001	10	5	3	1	2	2	2	1	2	2	3	5	2	2	1	1	1	0	0	0	2	2	0	0	0	0	0	0	0	0	0	0
2040	0	47			8	1	1	3	2		20	1998	15	5	1	1	2	3	1	4	1	2	3	5	2	1	1	1	0	1	0	0	1	1	1	3	0	0	0	0	0	0	0	0
3100	1	47	0		8	1	0	3	2		15	1987	27	0	3	0	0	0	2	2	2	2	0	5	3	3	0			4	1	0	1	1	1	2	0	0	0	0	0	0	1	1
310	0	50			8	1	0	3	2		60		20	0	0	2	2	0	1	2	3	2	2	5	1	3	0			0	0	0	0	6	3	2	0	1	0	0	0	0	0	1
2034	0	50			8	1	1	0	2		20		35	5	2	1	3	3	2	4	1	1	1	5	3	2	1	1	0	4	0	0	1	0	1	6	0	0	0	0	0	0	0	0
3106	0	50			8	1	0	1	2		20	1979	35	5	0	2	0	2	2	4	4	2	0	5	1	1	1	1	0	3	1	3	0	0	0	3	0	0	0	0	0	0	0	0
2115	0	55			8	1	1	2	2		60	1970	43	0	0	3	0	0	2	0	3	3	0	5	0	5	3	1	0	2	4	0	0	0	2	0	0	0	0	0	0	0	0	0
238	0	59			8	1	1	1	2		2			5	4	1	1	0	2	2	3	2	1	5	5	2	1			4	1	0	0	0	5	0	0	0	0	0	0	0	0	1
64	0	60			8	1	1	1	2			1967	45	5	0	1	1	3	2	3	1	3	0	5	1	2	0			0	0	0	0	0	0	2	0	0	0	0	0	0	0	1
2077	0	62			8	1	1	4	2		20	1989	26	5	2	2	4	3	2	3	1	1	2	5	2	2	3	1	0	2	2	0	0	0	0	6	0	0	0	0	0	0	0	1
19	0	62			8	1	1	1	2		3	1970	20	0	0	2	1	0	2	3	2	2	0	5	1	3	1	1	1	3	0	0	0	0	0	0	0	0	0	0	0	0	0	1
3041	0	63			8	1	1	1	2		20	1959	55	5	0	1	1	1	3	3	2	2	1	5	3	1	1	1	1	5	3	0	0	2	0	6	0	0	0	0	0	0	0	1
3042	1	64	1	5	8	1	1	3	2		15	1971	43	5	3	2	4	3	2	2	2	4	3	5	1	5	1	1	0	0	0	0	0	0	0	0	0	0	0	0	0	0	0	1
3017	0	68			8	1	1	3	2		25		50	5	0	1	1	2	2	0	1	2	0	5	1	2	0			2	0	0	2	0	0	2	0	1	0	0	0	0	0	1
3070	1	70	1	25	8	1	1	1	2		5	1974	40	5	1	1	3	3	2	3	2	2	0	5	2	5	1	1	1	7	4	0	2	5	5	6	1	1	0	0	0	0	0	0	10		1	1
3	0	72			8	1	1	1	2		60	1955	57	0	0	2	0	2	2	2	3	2	0	5	1	0	1	1	2	0	0	0	3	0	0	3	0	1	0	0	0	0	0	0
3119	0	73			8	1	1	0	2		10			5																1	0	0	4	2	0	3	1	1	0	1	0	0	0	1	4				8
3025	1	23	0		8	1	1	4	2		5	2014	1	5	0	1	2	3	2	2	2	3	1	5	3	3	1	1	0	0	0	0	0	2	0	3	0	0	0	0	0	0	0	1
262	0	48			8	1	1	3	2		20	1984	20	5	0	2	3	1	2	4	2	1	1	5	2	1	3	0	2	4	2	2	7	6	1	0	0	1	0	0	0	0	0	0
3113	0	51			8	1	0	1	2		6		29	5	4	1	3	3	1	3	2	2	0	5	1	2	1	1	1	2	0	0	0	0	0	3	1	1	0	1	0	1	2	1	16		5		11
80	1	53	1	4	8	1	1	1	2		30		20	0	1	1	1	1	2	1	3	3	3	5	0	3				5	0	0	1	0	1	2	0	1	0	0	0	0	0	0
60	0	58			8	1	1	1	2		15	1977	35	5	2	1	1	1	2	3	2	1	4	5	4	2	2	0	2	1	0	0	0	0	0	6	0	1	0	0	0	0	0	0
220	0	60			8	1	1	1	2		40	1972	40	5	3	1	2	3	1	3	2	3	3	5	1	2	0			0	0	1	5	0	0	2	0	1	0	0	0	0	0	1
294	0	22			7	1	1	1	2		45		5	5	0	1	0	2	1	4	3	4	0	5	2	3	1	1	0	0	0	0	0	0	1	3	0	0	0	0	0	0	0	0
3112	0	23			7	1	0	4	2		20		5	0	1	1	3	1	2	3	3	2	0	5	4	1	3	0	2	2	0	0	0	0	0	0	0	0	0	0	0	0	0	1
234	0	31			7	1	1	2	2		40	1995	17	5	0	1	0	1	1	1	2	2	0	5	1	2	0			1	1	0	0	1	3	6	0	0	0	0	0	0	0	1
343	1	31	0		7	1	1	3	2		25		13	5	0	1	0	0	1	2	4	1	2	5	2	5	1			0	0	0	0	0	0	7	0	0	0	0	0	0	0	0
61	1	32	0		7	1	0	3	2		15	1997	15	0	1	1	1	1	2	2	3	2	1	5	2	3	1	1	0	0	0	0	0	1	1	6	0	0	0	0	0	0	0	1
170	1	33	1		7	1	0	2	2		10		20	5	1	2	1	1	2	1	3	3	1	5	1	1	1	1	2	0	0	0	0	0	0	0	0	0	0	0	0	0	0	1
252	1	38	0		7	1	1	1	2		40		24	5	2	2	1	2	2	2	4	3	2	5	4	2	1	1	0	0	0	0	3	0	3	3	0	0	0	0	0	0	0	1
250	1	41	0		7	1	0	1	2		20	1988	23	5	1	2	1	3	1		3	3	1	5	0	2	0			0	0	2	2	0	0	6	0	1	0	0	0	0	0	0
2084	0	42			7	1	1	0	2		20	1990	23	5	0	2	4	2	2	3	1	3	0	5	2	0	1	1	1	0	0	0	0	1	0	0	0	0	0	0	0	0	0	0
312	0	43			7	1	1	2	2		8		20	0	1	0	2	1	2	5	1	1	0	5	1	3	1	0	2	4	0	0	1	0	0	2	0	0	0	0	0	0	0	1
158	0	47			7	1	0	3	2					0	0	2	0	1	2	4	2	1	0	5	2	4	1	1	2	1	0	0	0	1	0	3	0	0	0	0	0	0	0	1
133	1	48			7	1	1		2		20		15	5	0	1	0	1	1	3	3	2	0	5	2	2	1	1	1	0	0	0	0	0	0	5	0	0	0	0	0	1	0	0
3056	0	50			7	1	1	0	2		20	1984	30	5	0	1	0	2	2	2	3	2	0	5	2	3	1										1	0	0	0	0	0	0	0	0	0
288	1	50	0		7	1	1	3	2		10		20	5	0	1	1	2	2	3	1	2	0	5	3	2	2	1	2	4	0	0	0	0	1	0	0	0	0	0	0	0	0	0
3101	1	54	1	7	7	1	1	1	2		10	1992	22	0	0	2	1	3	2	2	2	3	0	5	4	3	1		2	1	0	0	0	1	1	3	0	0	0	0	0	0	0	1
298	0	66			7	1	1	1	2		30	1966	43	2	0		2	1	1	4	1	3	3	5	2	1	0			0	0	0	0	0	0	0	1	0	0	0	0	0	0	0	4				8
3014	0	66			7	1	0	4	2		40	1963	51	5	0	2	1	1	1	3	1	1	0	3	3	0	1	1	1	7	0	2	5	0	0	3	1	1	0	0	0	0	0	0	8		6
3111	0	24			7	1	1	3	2		20	2007	7	5	0	2	1	3	2	4	2	3	4	5	2	2	2	0	2	0	1	0	0	0	0	7	0	0	0	0	0	0	0	1
116	1	25	0		7	1	1	4	2		5	2007	5	5	1	1	2	2	2	2	2	3	3	5	2	2	2	0	1	0	0	0	0	2	0	0	0	0	0	0	0	0	0	1
3087	1	30	0		7	1	1	1	2		17	1998	16	0	1	1	0	3	2	2	4	2	1	5	3	5	1	1	2	0	0	0	0	0	0	7	0	0	0	0	0	0	0	0
2035	0	37			7	1	1	2	2		40	2003	10	5	0	2	0	3	2	4	2	1	3	5	2	4	1	1	1	0	0	0	0	0	2	6	0	0	0	0	0	0	0	0
245	1	46	1	4	7	1	0	3	2		20	1996	16	0	1	2	2	2	2	2	3	1	3	5	2	1	1	1	1	0	0	0	0	1	1	0	0	0	0	0	0	0	0	0
235	0	52			7	1	1	1	2		40		34	0	0	1	1	2	2	3	2	3	3	5	1	2	0			1	0	0	0	0	0	0	0	0	0	0	0	0	0	1
256	0	54			7	1	1	2	2		20	1977	25	4	0	1	1	2	2	2	1	2	0	5	3	4				1	0	0	7	1	1	6	0	0	0	0	0	1	0	1
378	0	33			6	1	1	4	2		40	2000	12	0	3	1	1	2	2	3	3	3	2	5	2	5	1	0	2	0	0	0	0	0	5	6	0	0	0	0	0	0	0	0
2004	1	34	0		6	1	0	2	2		20		10	5	0	2	1	2	2	1	5	4	1	5	1	5	1			0	0	0	0	0	0	0	0	0	0	0	0	0	0	0
52	1	40	0		6	1	0	3	2		25	1996	14	5	2	1	3	2	1	3	1	3	3	5	3	5	0			4	0	0	0	1	0	3	0	0	0	0	0	0	0	0
3078	0	42			6	1	1	3	2		50		24	5	0	2	1	3	2	2	1	3	0	5	2	2	0			4	2	0	7	0	0	3	0	0	0	0	0	0	0	0
3046	0	43			6	1		0	2		4		30	4	0	4	3	2	2	2	1	4	0	5	4	3	0			1	0	1	0	1	1	7	0	0	0	0	0	1	0	1
373	0	48			6	1	1	2	2		30		28	0	0	0	0	2	2	4	1	2	0	5	1	1	0			1	2	1	0	0	2	3	0	0	0	0	0	0	0	0
3018	1	50	1		6	1	0	4	2		20	2009	5	0	1	1	4	3	2	2	2	2	0	5	4	1	0			1	1	0	1	1	6	6	0	0	0	0	0	0	0	0
207	1	56	1	6	6	1	0	2	2		3			0	2	2	0	2	1	1	2	3	2	5	1	2	1		0	2	2	0	3	0	0	1	0	1	0	0	0	0	0	1
354	0	57			6	1	0	1	2		5	1976	5	0	0	1	3	3	2	3	2	2	1	5	3	2	1	0	1	1	0	0	5	1	1	3	0	1	0	0	0	0	0	1
3053	0	59			6	1	1	1	2		10		40	0	1	1	3	3	2	2	2	2	0	5	1	3	1	1	0	6	3	0	2	2	0	6	1	1	0	0	0	0	0	0	1		12
127	1	59	1	20	6	1	1	1	2		15	1977	36	0	0	2	1	1	1	3	2	2	0	5	1	4	0			7	0	0	5	0	0	6	0	1	0	0	0	0	0	0
3096	1	60	1	3	6	1	1	1	2		8		35	5	4	1	4	4	2	4	2	1	0	5	3	4	1	1	2	4	0	0	3	0	3	6	0	1	0	0	0	0	0	0
143	1	61	1	15	6	1	0	1	2		20		25	0	2	2	2	2	2	2	1	1	2	5	1	1	1	1	1	1	3	3	3	0	0	3	1	1	0	1	0	0	0	1	7	8
3030	0	67			6	1	1		2		10	1967	9	5	0	2	4	3	2	2	1	2	0	5	3	1	3	1		7	0	0	3	3	0	3	0	1	0	0	0	0	0	0
3051	0	74			6	1	0	0	2		20		60	0	0	2	1	1	2	4	2	2	0	5	1	2	1	1	0	1	0	0	0	0	0	6	1	1	0	0	0	1	0	1	7	12
75	1	37	0		6	1	0	3	2		20	1990	22	0	0	3	0	0	0	0	1	3	0	5	1	4	1	1	0	2	0	0	0	1	4	3	0	0	0	0	0	0	0	0
255	0	44			6	1	1	2	2		20		11	5	2	3	3	1	2	4	2	2	1	5	2	1	2	1	2	0	0	0	0	1	1	0	0	0	0	0	0	0	0	0
114	1	15	0		5	1	0	1	2		20		3	0	0	1	2	2	1	1	2	1	1	5	2	4	1	1	2	1	0	0	0	0	1	4	0	0	0	0	0	1	0	0
340	0	16			5	1	0	3	2		6		2	0	2	2	2	2	3	3	4	4	4	5	0	3	2	0	2	0	0	0	0	0	1	2	0	0	0	0	0	0	0	0
3075	0	35			5	1	0	1	2		80		25	5	0	2	0	3	3	4	2	2	0	5	3	2	1	1	2	4	2	0	5	2	0	6	0	0	0	0	0	0	0	0
140	0	37			5	1	1	1	2		65	1997	15	0	0	3	0	1	2	4	3	3	0	5	2	2	0			5	0	2	1	2	1	0	0	0	0	0	0	0	0	1
43	0	42			5	1	0	1	2		15		20	0	0	2	0	1	2	4	0	0	0	5	2	2	1	1	2	1	0	0	1	1	1	2	0	0	0	0	0	0	0	1
301	0	65			5	1	1	4	2		1			5	1	2	0	0	1	4	2	1	1	5	2	3	1	0	1	7	0	0	0	0	5	3	1	0	0	0	0	0	0	1	17	17		0	8
281	0	72			5	1	0	3	2		25		55	0	0	1	1	2	2	2	1	2	0	5	1	0	1	1	1	1	1	0	0	2	4	0	0	0	0	1	1	0	0	1	52			5	4
3110	0	65			11	0	0	1	2		45	1964	50	2	0	1	3	0	1	3	1	4	0	5	2	4	1	1	1								0	0	0	0	0	0	0	0
2024	1	17			10	0	0	3	2		20	2010	3	0																0	0	0	0	0	0	4	0	0	0	0	0	0	0	0
2047	1	20	0		10	0	1	0	2		10			0	0	2	0	1	2	0	1	2	1	5	1	5	3		0	0	0	0	0	0	0	0	0	0	0	0	0	0	0	0
2112	0	22			10	0	0	4	2		20	2011	2	5	1	2	2	2	2	4	1	3	3	5	2	3	2	0	1	0	0	0	0	0	0	2	0	0	0	0	0	0	0	0
370	1	22	0		10	0	0	4	2		23	2008	4	0	1	2	1	2	3	3	1		1	5	1	5	2	1	1	0	0	0	0	0	0	7	0	0	0	0	0	0	0	0
2097	0	25			10	0	0	4	2		30			5	1	0	1	2	2	2	2	2	3	5	3	1	3	0	0	2	0	0	0	2	0	0	0	0	0	0	0	0	0	1
2087	1	26	0		10	0	0	0	2		40	2004	9	5	1	1	2	3	0	1	0	0	1	5	0	3	1	1	1	4	0	0	1	2	0	0	0	0	0	0	0	0	0	0
2095	0	27			10	0	0	3	2		40	2009	10	0	0	1	1	3	2	5	3	4	0	5	2	1	2	0	2	2	0	0	0	2	0	7	0	0	0	0	0	0	0	0
2113	0	43			10	0	1	1	2		30	1990	23	0	0	2	3	2	2	1	3	3	1	5	1	1	0			1	0	0	0	0	0	6	0	0	0	0	0	0	0	0
365	1	45	0		10	0	1	3	2		15	1985	27	0	0	1	1	1	2	3	2	2	1	5	1	5	2	1	0	2	0	0	2	0	0	6	1	0	0	0	0	0	0	0	0	16
145	1	68	1	16	10	0	0	1	2		9		16	0	1	2	2	2	2	2	2	3	3	5	2	3	1	1	1	3	3	3	3	0	0	3	1	1	0	1	0	0	0	1	45			23	9
73	1	23	0		9	0	0	3	2		20	2005	7	0	0	1	2	2	2	2	2	1	0	5	0	1	1	1	0	1	0	0	0	0	1	6	0	0	0	0	0	0	0	0
2099	1	24			9	0	0		2		5	1984	5	5	1	0	2	3	1	1	1	3	3	5	1	2	3	0	0	0	0	0	0	0	0	4	0	0	0	0	0	0	0	0
371	1	31	0		9	0	0	3	2		20		15	0	0	2	0	1	2	3	3	3	0	5	1	2	0			1	0	0	1	1	1	6	0	0	0	0	0	0	0	0
2109	1	38	0		9	0	0	2	2		5			5	0	2	0	2	1	4	2	2	1	5	2	5	3	1	0	1	0	0	0	0	0	6	0	0	0	0	0	0	0	0
269	0	30			9	0	0	3	2		30	2000	12	0	1	2	1	1	3	0	3	3	1	5	2	2	0			1	0	0	5	0	0	6	0	0	0	0	0	0	0	0
141	0	31			9	0	0	2	2		20	2011	1	0	3	2	2	2	4	3	2	3	0	5	0	0	1	0	2	1	0	0	0	2	0	0	0	0	0	0	0	0	0	0
2093	0	18			8	0	0	4	2		15	2012	1	3	0	2	1	2	0	3	3	3	0	5	0	5	2	0	2	0	0	0	0	0	0	6	0	0	0	0	0	0	0	0
367	0	19			8	0	0	3	2		10		2	0	0	2	1	1	2	1	2	2	1	5	0	2	1	0	2	0	0	0	0	0	0	2	0	0	0	0	0	0	0	0
187	1	19	0		8	0	0	0	2					0	0	2	1	2	2	2	3	3	1	5	1	3	0			0	0	0	0	0	0	2	0	0	0	0	0	0	0	0
3007	1	20	0		8	0	1	3	2		20			5	0	1	3	1	2	3	3	2	1	5	3	2	1	1	0	0	0	0	0	1	0	3	0	0	0	0	0	0	0	0
3095	1	20	0		8	0	0	3	2		8		4	0	0	2	2	1	1	1	2	2	1	5	1	3	1	1	2	0	0	0	0	0	0	6	0	0	0	0	0	0	0	1
51	0	26			8	0	0	4	2		20	2006	6	5	0	1	3	1	2	3	3	2	1	5	1	3	2	1	0	2	0	0	2	0	0	2	0	0	0	0	0	0	0	1
3027	1	26	0		8	0		3	2		20	2004	10	0	1	1	1	1	1	2	2	1	0	4	1	1	2	1	1	1	0	0	0	0	1	6	0	0	0	0	0	0	0	1
3102	0	27			8	0	1	3	2		10	2009	5	5	0	2	3	1	2	4	4	3	3	5	3	2	2	0	2	0	0	0	0	0	0	3	0	0	0	0	0	0	0	0
305	1	27	1		8	0	0	4	2		5	2001	7	0	3	1	3	3	2	2	2	2	3	5	1	2	0			1	0	0	2	2	6	7	0	0	0	0	0	1	0	0
2050	1	28	0		8	0	0	4	2		10	2003	10	0	1	2	2	3	2	2	3	3	3	5	3	2	1	1	0	2	0	0	2	0	0	1	0	0	0	0	0	0	0	1
335	0	37			8	0	1	4	2		40	1990	22	0	1	1	3	3	3	2	3	2	3	5	3	5	0			2	0	0	2	2	6	6	0	0	0	0	0	0	0	1
337	0	38			8	0	1	3	2		25	1990	22	0	0	1	1	1	2	2	2	2	1	5	3	5	0			0	0	0	2	2	0	0	0	0	0	0	0	0	0	0
168	0	38			8	0	1	3	2		20	1992	20	5	1	1	0	1	2	1	0	2	0	5	2	1	0			0	0	0	4	0	0	7	0	1	0	0	0	0	0	0
353	1	41	0		8	0	1	3	2		20	1984	29	5	0	2	2	3	2	3	2	2	0	5	3	3	0			0	0	0	0	0	0	6	0	0	0	0	0	0	0	1
188	1	44	0		8	0	1	0	2					0	0	2	1	2	2	2	3	3	0	5	1	3	0			5	0	0	1	0	1	0	1	1	0	0	0	1	0	1	8		12
2010	1	45			8	0	0	3	2		2	1980	33	5	1	2	3	2	1	2	3	2	1	5	1	0	2	1	1	0	0	2	5	0	0	6	0	1	0	0	0	0	0	1
2011	0	47			8	0	0	3	2					5	0	2	3	0	1	1	2	2	1	5	3	0	1	0	1	0	0	1	0	0	0	6	0	0	0	0	0	0	0	1
3035	1	47	0		8	0	1	3	2		2		7	5	0	3	1	3	2	2	3	2	2	5	3	5	3	1	1	0	0	0	1	0	0	0	0	0	0	0	0	1	0	0
88	1	47	0		8	0	1		2		15	1982	32	5	0	1	3	3	2	0	0	2	0	5	1	4	0			4	0	0	4	0	7	6	0	0	0	0	0	0	0	0
39	0	49			8	0	1	3	2		20	1979	34	5	0	1	0	1	2	3	0	2	0	5	1	2	0			1	0	0	0	0	0	6	0	0	0	0	0	0	0	0
3098	0	50			8	0	1	3	2		10		35	0	0	1	2	3	2	4	2	3	4	5	1	2	1	1	2	1	0	0	0	0	0	0	0	0	0	0	0	0	0	0
2016	0	55			8	0	1	4	2		50	1980	33	5	0	2	2	2	1	2	3	3	0	5	0	1	1	1	1	0	0	0	0	0	0	0	0	0	0	0	0	0	0	0
3031	1	21	0		8	0	0	3	2		20	2012	2	0	2	3	3	3	2	3	2	1	4	3	1	5	2	1	1	0	0	0	0	0	0	1	0	0	0	0	0	0	0	0
135	1	33	0		8	0	1	3	2		5	2002	10	0	1	1	3	3	2	3	2	2	1	5	1	3	2	1	0	1	0	0	1	0	0	0	0	0	0	0	0	0	0	0
241	0	67			8	0	1	1	2		40		30	5	1	1	1	1	2	3	0	3	1	5	0	0	1	1	0	7	0	0	0	0	1	6	0	1	0	0	0	0	0	1
3012	1	15	0		7	0	0	3	2		5	2013	1	0	0	1	1	1	0	4	2	1	0	5	3	0		0	1	2	0	0	2	2	4	1	0	0	0	0	0	0	0	0
3099	0	26			7	0	1	3	2		15	2002	12	5	1	2	4	1	1	2	4	3	3	5	1	5	1	0	2	1	0	0	0	0	0	6	0	0	0	0	0	0	0	0
3090	0	26			7	0	0	4	2		15		7	5	4	2	4	3	2	2	3	4	0	5	1	1	2	0	1	0	0	0	0	0	4	2	0	0	0	0	0	0	0	0
304	0	33			7	0	1	2	2		40		12	0	1	1	1	1	2	2	3	2	4	5	4	5	0			2	0	0	0	0	0	0	0	0	0	0	0	0	0	0
223	0	34			7	0	0	4	2		1			5	1	1	2	2	2	2	2	3	2	5	2	3	2	0	0	1	0	0	1	0	1	0	0	0	0	0	0	0	0	1
303	0	35			7	0	1	2	2		40		15	5	0	1	0	3	1	5	3	1	0	5	1	4	0			1	0	0	0	0	0	6	0	0	0	0	0	0	0	0
297	1	35	0		7	0		3	2		20	1995	17	0	0	1	0	3	3	4	2	2	0	5	4	5	0			0	0	0	0	0	0	7	0	0	0	0	0	0	0	0
363	0	37			7	0	1	3	2		50		19	5	0	1	1	2	2	2	2	1	1	5	2	1	0			0	0	2	1	0	5	6	0	1	0	0	0	0	0	0
251	1	37	0		7	0	0	3	2		20	1998	14	5	0	2	2	3	2		4	2	3	5	0	2	0			4	3	0	6	2	0	6	0	0	0	0	0	0	0	0
336	1	37	0		7	0	1	4	2		15		7	0	2	0	1	2	2	2	3	3	2	5	2	1	1	1	0	0	2	0	0	0	1	0	0	0	0	0	0	0	0	0
3047	1	39	0		7	0	1	2	2		20	1993	21	0	0	2	4	1	2	2	2	2	3	5	3	2	0			5	0	3	1	1	0	3	0	0	0	0	0	1	0	0
311	0	40			7	0	0	3	2		10	1992	18	5	1	1	1	2	1	3	2	2	3	5	1	2	3		0	1	0	0	1	0	0	2	0	0	0	0	0	0	0	1
2001	1	43			7	0	0	4	2		30		28	5	0	2	0	2	2	1	0	3	0	5	3	5	1	0	1	3	0	0	2	0	6	2	0	0	0	0	0	0	0	0
156	0	45			7	0	1	1	2		40		20	5	3	1	1	2	2	4	2	2	3	5	2	3	0			1	1	0	2	0	0	6	1	0	0	0	0	0	0	0
90	0	52			7	0	1	3	2		15	1977	35	5	0	1	1	1	2	1	3	2	0	5	1	3	0			2	2	0	3	0	0	6	0	0	0	0	0	0	0	0
142	0	58			7	0	1	3	2		40	1980	32	5	0	1	1	2	2	1	2	2	0	5	2	0	1	1	0	2	0	0	0	0	0	0	0	0	0	0	0	0	0	0
2055	0	64			7	0	1	4	2		30	1988	20	5	1	2	1	3	2	4	2	2	4	5	1	0	3	1	0	7	0	3	3	0	1	6	0	1	0	0	0	0	0	1
3062	1	66	1	24	7	0	0	1	2		40		44	0	2	1	4	2	2	2	1	1	0	5	2	1	1	0	2	7	4	6	0	0	3	3	0	0	0	0	0	0	0	1
131	1	67	0		7	0	0	2	2		5		20	5	0	0	2	2	2	3	1	2	2	5	0	2	0			0	0	0	0	1	0	3	1	1	1	0	0	0	0	1
3061	0	41			7	0	1	4	2		30		20	0	0	1	1	3	1	2	5	3	0	5	3	2	1	1	0	2	0	0	1	2	4	1	0	0	1	0	0	0	0	0
3008	1	24	0		7	0	0	4	2		4	2012	2	5	5	2	4	3	2	4	2	1	0	5	3	5	1	0	0	1	0	0	0	2	3	3	0	0	0	0	0	0	0	1
3024	1	24	0		7	0		4	2		10	2005	9	5	1	0	1	3	2	2	3	3	0	5	0	0	1	1		4	0	0	2	0	3	2	0	0	0	0	0	0	0	0
62	1	31	0		7	0	0	3	2		17	2000	8	5	3	1	2	2	2	2	2	2	3	5	2	4	1	0	1	0	0	2	0	0	0	2	0	0	0	0	0	0	0	0
3076	0	32			7	0	1	2	2		20		18	3	1	3	0	3	2	3	3	1	1	5	2	3	1	1	0	1	0	0	0	0	0	6	0	0	0	0	0	0	0	1
2030	1	32			7	0	0	4	2		20	1999	14	0	2	2	3	3	2	4	2	2	3	5	3	5	1	1	1	1	0	0	4	2	0	6	0	0	0	0	0	0	0	0
334	1	32	0		7	0	0	4	2		20	1998	14	0	3	1	3	3	3	2	3	2	3	5	3	5	2	0	2	0	0	0	0	0	2	0	0	0	0	0	0	0	0	0
111	1	32	0		7	0	0	3	2		6		2	0	0	2	3	3	3	2	3	2	3	5	3	0	0			0	0	0	0	0	0	2	0	0	0	0	0	0	0	0
3115	0	34			7	0	0	4	2		15		17	5	1	2	4	3	1	5	2	2	3	5	4	3	1	0	2	1	0	0	2	0	0	3	0	0	0	0	0	0	0	0
3055	0	37			7	0	1	1	2		40		20	5	0	1	0	3	0	2	2	2	0	5	3	2	1	1	2	1	0	0	1	1	3	6	0	0	0	0	0	1	0	0
2003	0	40			7	0	1	3	2		30		25	3	5	5	5	4	1	2	3	3	4	5	5	3	1	0		3	0	0	4	0	0	7	1	0	0	0	0	0	0	1	2			0
226	0	42			7	0	0	2	2		40	1982	30	0	0	2	0	1	2	2	3	2	0	5	2	1	0			0	0	4	0	0	0	5	0	0	0	0	0	0	0	1
273	0	47			7	0	1	1	2		30	1978	34	5	0	1	2	1	2	3	2	2	0	5	1	3	0			2	0	2	2	1	3	2	0	0	0	0	0	0	0	1
257	0	21			6	0	1	3	2		20		3	5	0	1	1	1	1	1	2	2	1	5	2	1	1	1	0	0	0	0	2	0	1	4	0	0	0	0	0	0	0	0
236	0	34			6	0	1	2	2		7	1990	22	5	0	1	0	1	1	2	3	3	1	5	3	3	0			1	1	0	0	1	1	6	0	0	0	0	0	0	0	1
292	0	35			6	0	0	3	2		20		11	5	1	1	1	3	2	2	2	2	1	5	1	5	1	1	0	0	0	0	4	0	0	0	0	0	0	0	0	0	0	1
227	1	38	1		6	0	0	2	2		20	1989	23	5	0	1	3	3	2	1	3	2	0	5	1	2	0			0	0	0	0	0	2	6	0	0	0	0	0	0	0	0
308	1	39	0		6	0	1	4	2		20	1993	19	0	1	2	3	3	2	1	3	2	3	5	3	0	0			1	0	0	4	0	1	3	0	0	0	0	0	0	0	1
229	1	40			6	0	0	2	2		20		10	0	1	2	1	2	1	3	2	3	2	5	2	4	1	1	2	1	0	0	3	0	2	4	0	0	0	0	0	0	0	0
2091	0	45			6	0	1	2	2		20	1985	28	5	1	1	2	3	2	3	2	3	1	5	3	5	1	1	1	4	0	0	4	2	0	3	0	0	0	0	0	0	0	0
167	1	46	1	5	6	0	0	1	2		10	1992	20	0	0	2	0	2	2	4	2	2	0	5	3	4	0			4	0	0	2	0	0	0	0	0	0	0	0	0	0	1
2039	1	49	0		6	0	0	0	2		20			5	1	2	3	3	2	2	1	3	2	5	0	3	1	1	1	1	1	0	0	0	1	4	0	1	0	0	0	0	0	1
195	1	49	1	2	6	0	1	3	2		20		18	0	0	1	2	2	2	2	2	3	0	5	2	2	1	1	2	1	0	0	0	0	1	0	1	0	0	0	0	0	0	1
286	0	50			6	0	0	2	2		10	1992	20	5	1	2	0	2	2	2	3	2	0	5	1	2	0			1	0	0	0	0	0	0	0	0	0	0	0	0	0	0
3077	0	51			6	0	1	2	2		10		35	5	0	0	3	4	2	3	1	3	2	1	2	1	3			1	0	0	5	1	0	6	0	1	0	0	0	0	0	0
2019	0	54			6	0	1		2		40	1973	40	0	0	3	1	4	2	2	2	3	1	5	1	1	1	1	2	0	0	0	0	0	0	0	0	0	0	0	0	0	0	0
197	0	75			6	0	1	1	2		15	1952	60	3	0	1	1	3	2	2	3	2	3	5	1	1	1	1	0	1	0	0	0	0	2	0	0	0	0	0	0	0	0	0
3044	0	25			6	0	0	3	2		20		9	5	0	3	4	4	2	2	3	3	2	5	3	5	1	1	2	0	0	0	0	0	0	4	0	0	0	0	0	0	0	0
3063	0	36			6	0	1	3	2		15	1992	22	5	0	1	1	1	2	2	3	3	1	5	3	5	0			2	2	0	0	0	0	7	0	0	0	0	0	0	0	1
3117	1	56	1	3	6	0	1	2	2		0		41	0	3	0	0	2	0	1	1	1	0	5	4	1	3	1	0	4	2	2	5	2	0	3	0	1	0	0	0	0	0	1
3089	0	32	0		5	0	0	2	2		15		12	5	0	2	4	3	2	3	2	2	1	5	3	2	3		0	0	0	0	4	2	4	0	0	0	0	0	0	0	0	0
123	1	46	0		5	0	1	3	2		60	1972	40	0	0	1	3	1	2	2	4	2	0	5	0	2	0			0	0	2	0	0	0	1	0	0	0	0	0	0	0	1
91	0	78			5	0	1	0	2		7		20	0	2	2	2	2	2	5	0	3	0	5	2	1	1	1	2	4	0	0	0	0	0	0	1	1	1	1	0	0	0	0	8		0
366	1	46	0		5	0	1	3	2		15	1982	30	0	1	1	2	2	2	3	2	2	1	4	2	2	0			0	0	0	0	2	6	0	0	0	0	0	0	0	0	0
278	0	24			4	0	0	3	2		35		5	5	2	0	1	2	2	5	1	1	1	5	1	0	1	0	2	0	0	0	0	0	0	6	0	0	0	0	0	0	0	0
274	1	38	0		4	0	1	3	2		30	1987		5	3	1	0	0	1	1	3	3	3	5	1	1	0										0	0	0	0	0	0	0	1
377	1	42	0			0	1	4	2		5			0	1	1	1	1	2	3	2	3	1	5	1	4	1			0	0	0	1	0	0	0	0	0	0	0	0	0	0	0
2005	1	18	0		10		0	3	2		20	2011	2	5	0	1	2	1	2	3	5	3	0	5	1	3	1	1	0	0	0	0	0	0	0	0	0	0	0	0	0	0	0	0
106	0	74			5			0	2		13	1956	56	5	0	1	4	2	3	4	2	2	0	5	2	1	1	1	2	0	2	0	0	2	0	3	0	0	0	0	0	0	0	0
2054	1	21	0						2		2	2012	1	0	0	1	3	3	1	3	1	2	3	5	3	4	3	1	0	0	0	0	6	0	2	2	0	0	0	0	0	0	0	0
3036	0	72			13	1	0	0	1	17				5	3	4	3	2	2	2	1	0	1	5	1	1	1	1	2	0	0	0	0	2	0	6	1	0	0	0	0	0	2	1	25	18
2083	0	15			12	1	0	2	0					0	1	2	2	3	2	1	1	2	3	5	2	4	1	0	0	0	0	0	0	0	0	0	0	0	0	0	0	0	0	1
2065	0	15			12	1	0	2	0					0	1	2	1	3	2	2	3	3	3	5	1	5	1	0	1								0	0	0	0	0	0	0	0
2085	1	19	0		12	1	0	4	0					5	0	2	0	3	2	1	1	3	1	5	1	5	2	1	0	0	0	0	0	0	0	0	0	0	0	0	0	0	0	0
2106	1	30	0		12	1	0	4	0					0	3	1	4	3	2	2	1	3	4	5	1	1	1	1	0	0	0	0	0	1	0	1	0	0	0	0	0	0	0	1
2107	1	39	0		12	1	0	3	0					0	1	2	3	3	0	2	2	4	0	5	2	4	3	1	0	1	0	0	0	0	1	0	0	0	0	0	0	0	0	1
190	1	56	1	1	12	1	1	1	0					0	0	1	1	2	2	2	2	2	3	5	2	1	0			7	0	0	0	0	0	2	0	0	0	0	0	0	0	1
173	1	59	1	10	12	1	0	0	0					0	1	2	1	1	2	2	2	1	1	5	1	2	0			4	3	0	5	2	7	6	0	1	0	0	0	0	0	0
2078	1	60	1	12	12	1	1	4	0					5	2	2	4	3	2	3	2	2	3	5	2	4	3	1	0	0	0	0	0	3	0	0	0	1	0	0	0	0	0	1
65	0	69			12	1	1	1	1				18	0	0	2	2	1	2	5	2	2	0	5	2	2	0			5	0	0	3	5	0	6	1	1	0	0	0	0	0	1	8		9
2061	0	71			12	1	1	0	0					5	0	2	1	1	3	4	1	2	0	5	1	2	0			0	0	0	3	0	0	0	1	1	0	0	0	0	0	1	8		18
10	0	77			12	1	0	0	1	20				5	2	1	3	3	2		2		2	5	2	1				2	2	0	0	2	2	2	0	0	0	0	0	0	0	1
81	0	83			12	1	1	0	1	1				5	3	1	3	2	2	2	0	2	3	5	2	3	1	1	0	5	0	0	0	5	0	3	1	0	0	0	0	0	0	1	20		1	0	5
45	0	86			12	1	1	1	1	0	40		20	5	0	2	2	2	2	2	2	2	3	5	1	1	0			0	0	0	0	0	0	0	1	1	0	1	1	0	0	1	4				5
96	1	73	1	28	11	1	1	0	0					0	0	1	0	1	2	2	2	2	0	4	2	3	0			7	0	0	0	4	0	6	0	0	0	0	0	0	0	1
34	1	74	1	25	11	1	1	0	0					0	0	0	3	3	3	3	1	1	0	4	1	1	1	1	2	0	0	0	0	0	3	0	0	0	0	0	0	0	0	1
283	0	79			11	1	1	4	1	15				0	0	1	3	3	2	2	2	2	3	5	1	5	0			2	0	0	0	0	0	0	1	1	0	1	0	0	0	1	8		1
2064	0	15			10	1	0	2	0					0	4	1	3	3	2	2	1	1	3	5	3	1	3	0	0	0	0	0	0	0	0	0	0	0	0	0	0	0	0	0
2031	0	15			10	1	0	2	0					0	1	2	3	2	2	4	2	3	3	5	2	2	1	0	1	0	0	0	2	0	0	2	0	0	0	0	0	0	0	0
368	1	15	0		10	1	0	1	0					0	2	1	3	2	2	2	2	2	3	5	2	2	1	0	1	0	0	0	0	0	1	4	0	0	0	0	0	0	0	0
324	1	15	0		10	1	1	2	0					0	1	1	2	2	2	1	2	2	2	5	1	2	1	0		0	0	0	0	0	0	2	0	0	0	0	0	0	0	0
3010	1	20	0		10	1	0	4	0					0	3	2	3	3	1	1	3	2	4	3	2	2	1	1	1	2	0	0	0	0	1	0	0	0	0	0	0	0	0	0
2028	0	35			10	1	0	0	0					0	0	1	2	3	1	3	1	0	3	5	3	3	1	1	1								1	1	0	0	0	0	0	0	37	17	12
240	1	42	0		10	1	0	2	0					5	0	1	0	2	2	4	1	1	3	5	2	3	0			0	0	2	0	0	0	6	0	0	0	0	0	1	0	1
270	0	44			10	1	1	3	1		50	1981	30	0	1	2	1	3	2	3	3	0	0	5	1	0	1	1	2	2	0	0	0	3	1	6	0	0	0	0	0	0	0	1
189	1	60	1	12	10	1	0	1	0					0	1	1	2	2	2	2	2	2	4	5	2	1	0			2	0	0	0	0	0	6	1	0	0	0	0	0	0	0
3108	1	60	1		10	1	1	4	0					0	1	2	3	2	2	3	2	3	1	5	2	2	0										1	0	1	0	0	0	0	0
184	0	63			10	1	0	2	1	20				5	0	2	3	3	2	3	3	3	2	5	3	2	1	1	2	2	0	0	0	0	3	6	0	0	0	0	0	0	0	0
185	0	63			10	1	0	1	1	6				5	3	1	3	3	1	3	2	3	0	5	1	0	1	1	2	0	0	0	0	0	0	0	1	1	0	1	0	0	0	0	15		1		5
99	0	64			10	1	1	1	1	25				3	3	3	1	1	1	4	3	2	0	5	2	1	2	1	1	2	0	0	4	2	2	6	1	1	0	0	0	0	0	1	40	18	1	0
179	1	65	1	14	10	1	0	1	0					0	0	2	2	2	1	4	4	4	2	5	2	3	0			6	2	3	0	0	0	3	1	1	0	0	0	1	0	1	10		1	0
242	0	67			10	1	1	1	0					0	0	1	0	1	2	4	1	1	0	5	2	2	1	0		0	0	0	0	3	0	3	0	0	0	0	0	0	0	0
113	0	72			10	1	0	0	1	32				5	0	1	0	1	2	4	2	2	0	5	4	1	0			1	2	0	0	0	0	2	1	0	0	0	0	0	0	0	1		13
208	1	72	1	22	10	1	0	0	0					5	3	1	3	3	2	2	2	2	3	5	3	1	0			7	1	0	0	0	4	0	1	1	0	0	0	1	0	1	16		12		18
2060	1	73	1	20	10	1	0	1	1	1				5	2	2	3	3	2	4	1	3	3	5	4	1	0			3	1	0	0	0	0	3	1	1	0	0	0	0	0	0	37	22	18
31	1	73	1	35	10	1	1	0	1	20	60		35	0	1	0	2	2	2	4	1	3	2	5	2	1	1	1	2	3	0	0	0	3	3	6	1	1	1	0	0	0	0	1	9	24		27
37	0	76			10	1	1	1	0					0	3	2	3	0	0	4	0	4	0	5	2	2	1	0	1	6	2	2	3	0	0	2	0	1	0	0	0	0	0	1
209	0	80			10	1	1	0	0					5	3	1	3	3	2	2	2	2	3	5	3	0	1	1	1	6	2	0	0	0	2	0	1	0	1	1	0	0	0	0	21		1	0
6	1	80	1	35	10	1	0	0	0					0	0	1	1	2	2	2	1	1	0	5	1	4	1		0	0	0	0	0	0	0	3	1	0	0	0	0	0	0	1	0	10
2052	1	83	1	30	10	1	0	0	0					0	0	1	1	2	2	4	1	2	3	5	1	0	1	1	0	5	1	3	0	0	0	2	1	1	0	0	0	0	0	1	13	16			8
326	0	15			9	1	0	1	0					0	1	1	1	2	2	2	2	2	1	5	1	2	2	0	2	0	0	0	0	0	1	4	0	0	0	0	0	0	0	1
358	0	15			9	1		2	0					0	1	1	2	2	2	2	2		0	5	1	2	2	0	1	0	0	0	1	0	0	7	0	0	0	0	0	0	0	0
136	1	32	0		9	1	0	3	0					0	3	2	3	3	2	2	2	2	1	5	2	3	0			1	0	0	1	1	1	0	0	0	0	0	0	0	0	0
159	1	48	0		9	1		3	0					0	1	2	3	3	2	3	2	2	3	5	1	2	1	0	0	0	0	0	0	2	0	0	0	0	0	0	0	0	0	1
128	1	48	1	2	9	1	1	1	0					0	1	1	3	3	2	4	1	2	0	5	3	1	0			0	2	4	1	0	0	5	0	1	0	0	0	0	0	1
205	1	56	1	2	9	1	0	1	0					0	0	1	3	1	0	2	3	1	1	5	2	0	1	1	1	1	0	0	0	0	0	2	0	1	0	0	0	0	0	1
102	0	58			9	1	1	1	1	8				5	0	1	4	1	2	3	2	2	3	4	3	1	1	0	1	4	0	1	7	0	0	2	1	0	0	0	0	0	0	1	10		1	0
265	1	59	1	8	9	1	0	1	0					0	0	0	2	1	2	2	2	2	1	3	0	3	2	1	1	5	0	2	4	1	1	0	1	1	0	0	0	1	0	1	1		12
103	0	65			9	1	1	1	0					5	2	1	1	0	2	3	2	2	1	5	1	1	1	1	1	0	0	2	0	0	2	6	1	0	0	0	0	0	2	0	16		14		11
36	0	67			9	1	1	1	1	1	30		45	0	0	1	1	2	2	3	1	2	0	5	2	2	1			6	2	0	6	0	1	6	1	1	0	0	0	0	0	1	8		18
3118	1	69	1	14	9	1	1	1	0					5	0	1	3	4	2	2	3	2	1	5	1	2	1	1	1	5	1	0	1	4	5	3	0	1	0	0	0	0	0	0
3015	1	70	1	23	9	1	1	1	0					0	0	1	3	0	1	2	2	2	0	3	1	1	2	1	0	5	3	0	5	3	0	0	1	1	0	0	0	1	0	1	16		1		11
3059	1	71	1	24	9	1	0	1	0					0	0	1	4	3	2	2	2	2	4	5	2	3	1	1	1								1	0	0	0	0	0	0	0	0	16
2007	0	80			9	1	1	4	1	21				5	0	1	3	3	2	3	2	3	3	5	1	2	2	1	1	0	2	0	0	0	0	2	1	0	0	0	0	1	0	1	0	16
338	1	15	0		9	1	1	2	0					0	3	1	2	3	2	2	2	4	3	5	3	2	2	0	1	0	0	0	0	0	0	4	0	0	0	0	0	0	0	0
28	1	51	1	2	9	1	1	3	0					5	2	2	4	3	3	4	3	2	3	5	3	5	1	1	0	4	0	1	0	4	0	3	1	0	0	1	0	0	0	1	10		1	0
3029	1	54	0		9	1	1	0	0					0	0	4	0	2	3	1	2	2	0	5	1	5	3	1	0	4	0	0	1	1	2	6	0	1	0	0	0	0	0	0
3016	1	59	0		9	1	1	4	0					5	0	0	1	1	2	0	1	2	0	5	3	2	1	1	1	1	0	0	0	0	0	0	0	1	0	0	0	1	0	1
253	1	66	1	13	9	1	0	1	0					0	3	1	3	3	3	3	1	2	3	5	1	3	2		2	0	0	0	0	0	0	0	1	1	0	1	0	0	0	1	20		14	0	5
279	0	85			9	1	1	1	0					5	0	1	2	3	2	4	3	0	2	5	2	0	0			0	0	0	0	0	0	0	1	1	1	0	0	0	0	0	15		6		11
3104	0	15			8	1	0	1	0					0	0	1	0	3	1	0	4	4	3	5	3	2	2	0	2	0	0	0	0	0	0	1	0	0	0	0	0	0	0	0
359	0	15			8	1		1	0					0	3	1	3	2	2	2	2	2	3	5	1	2	2	0	1	4	0	0	1	1	0	1	0	0	0	0	0	0	0	0
3116	1	15	0		8	1	0	1	0					0	1	1	2	3	1	2	2	2	0	5	4	5	1	0	2	0	1	0	0	0	0	6	0	0	0	0	0	0	0	0
322	1	15	0		8	1	0	2	0					0	1	1	2	1	2	2	2	3	1	5	2	2	1	0		0	0	0	0	0	2	1	0	0	0	0	0	0	0	1
317	0	17			8	1	0	3	0					0	0	2	1	3	1	0	3	2	3	5	1	4	2	0	2	0	0	0	2	0	0	4	0	0	0	0	0	0	0	0
348	0	17			8	1	0	2	0					0	3	2	3	2	2	2	3	2	3	5	0	3	2	0	1	0	0	0	0	0	2	4	0	0	0	0	0	0	0	1
161	1	28	0		8	1	1	2	0					0	0	1	1	2	2	1	1	2	2	5	2	4	1	1	2	6	0	0	4	0	2	6	0	1	0	0	0	0	0	1
74	0	29			8	1	0	1	0					3	3	1	1	1	2	4	3	3	1	5	1	1	0			1	0	2	1	1	0	2	0	0	0	0	0	0	0	0
350	1	29	0		8	1	0	4	0					0	0	1		1	2	2	3	3	3	5	3	3	0			1	0	0	2	0	0	2	0	0	0	0	0	0	0	0
351	1	30	0		8	1	0	4	0					0	1	1	2	1	2	2	2	2	2	5	2	2	2	1	1	0	0	0	1	0	4	4	0	0	0	0	0	0	0	0
126	1	30	1		8	1	0	1	0					0	0	2	0	0	0	0	3	2	0	5	2	1	1	1	1	1	0	0	1	2	0	1	0	0	0	0	0	0	0	1
352	0	35			8	1	0	4	0					5	1	1	1	1	2	2	2	2	2	5	1	2	2	0	0	0	0	0	0	0	0	2	0	0	0	0	0	0	0	1
3094	0	35			8	1	0	4	1	0				2	1	1	3	3	2	2	2	2	1	5	2	3	1	1	1	0	0	0	0	0	0	6	0	0	0	0	0	0	0	0
186	1	35	0		8	1	0	2	0		20	1997	15	0	0	1	1	2	2	2	2	3	1	5	2	2	0			2	0	2	0	0	5	0	0	0	0	0	0	0	0	0
332	0	37			8	1	1	1	0					5	1	2	3	1	2	0	2	2	0	5	1	5	0			1	0	0	1	0	5	6	0	0	0	0	0	0	0	0
293	1	38	0		8	1	0	1	0					0	2	1	0	2	1	4	3	3	0	5	2	2	1			4	0	2	1	4	0	2	0	0	0	0	0	0	0	0
165	0	40			8	1	1	1	0					0	0	2	1	0	3	3	3	2	0	5	1	2	3	1	2	4	0	0	2	0	1	3	0	0	0	0	0	0	0	1
72	1	40	0		8	1	0	4	0					0	1	1	3	3	2	2	2	2	1	5	2	2	1		0	6	0	0	2	0	0	6	0	0	0	0	0	0	0	0
157	0	41			8	1	0	1	1	5				3	1	2	0	1	0	2	3	3	1	5	3	0	1	0	2	1	0	0	5	1	2	3	0	0	0	0	0	0	0	0
58	0	43			8	1	0	3	0					5	0	3	1	3	2	3	4	3	1	5	3	3	2	0	1	2	0	2	0	1	2	3	0	1	0	0	0	0	0	0
3048	0	45			8	1	1	3	0		7		22	5	4	2	2	4	2	3	3	4	4	5	4	4	1	1	2	4	1	0	0	1	0	3	0	0	0	0	0	0	0	0
2049	0	46			8	1	1	2	0					5	0	2	1	3	2	4	2	3	3	5	2	2	1	1	0	2	0	0	0	0	0	6	0	0	0	0	0	0	0	1
21	1	46	0		8	1	0	2	0					5	1	1	2	2	2	2	1	1	1	5	2	3	1		0	6	2	0	1	2	3	6	0	0	0	0	0	0	0	1
130	1	46	1		8	1	1	2	0					0	1	1	1	3	2	2	2	2	0	5	2	2	0			1	0	0	0	1	0	0	0	0	0	0	0	1	0	1
2020	0	49			8	1	1	0	1	7				5	0	2	3	3	2	3	2	2	0	5	1	1	1	0	2	4	0	0	1	0	0	2	0	0	0	0	0	0	0	1
246	1	50	1	1	8	1	0	1	0					0	0	2	1	2	2	3	2	2	0	5	1	2	3	1	0	0	0	0	0	0	0	0	0	1	0	0	0	0	0	0
17	1	53	1	15	8	1	1	1	0					0	0	2	2	1	2	3	2	3	3	5	2	1	1		2	2	2	0	2	1	3	3	0	0	0	0	0	0	0	1
44	0	54			8	1	1	3	1	4	20	1978	30	5	0	2	3	2	2	4	1	2	1	5	2	1	2	1	0	0	0	0	0	0	0	7	1	1	0	1	0	0	0	1	4				8
2101	0	54			8	1	0	2	0					5	0	2	1	1	2	1	0	2	0	5	0	0	1	0	0	7	0	4	7	0	0	6	0	0	0	0	0	0	0	1
282	1	58	1	4	8	1	0	3	0					0	1	1	1	2	2	2	1	2	2	5	1	3	0			3	3	0	5	0	7	6	1	1	0	0	0	0	0	1	13	18			8
239	1	58	1	16	8	1	1	1	0					0	1	1	1	2	1	2	1	2	1	5	2	5	0			0	0	0	3	1	5	2	0	1	1	0	0	0	0	1
124	0	60			8	1	1	0	1	8	20		40	2	0	1	3	2	1	5	3	1	1	5	1	0	1	1	0	3	3	0	0	4	0	6	1	0	1	0	0	0	0	0	16		18		0
2056	1	60	1	7	8	1	1	3	0					0	1	2	1	4	1	4	1	1	0	5	3	3	3	1	0	6	0	0	0	0	0	6	0	1	0	0	0	0	0	1
277	0	61			8	1	1	4	1	1	30		28	5	0	3	1	3	2	3	2	2	4	5	2	1	0			0	0	3	0	0	1	6	1	1	0	0	0	0	0	1
259	0	62			8	1	1	1	1	36	13	1967	5	3	1	2	3	2	2	2	2	2	3	5	2	2	0			1	4	0	0	3	3	0	1	1	0	1	0	1	0	1	0	16
267	0	64			8	1	1	1	0					0	1	2	2	2	2	4	1	1	2	5	1	2	1	1	2	4	1	0	0	5	5	3	1	0	1	0	0	0	0	1
148	0	64			8	1	1	1	1	18	20	1963	30	5	1	1	4	3	2	4	1	2	0	5	1	2	2	1	0	6	0	0	0	6	0	3	1	1	1	0	0	1	0	0	10		14	0
2051	1	64	1	14	8	1	0	1	0					0	0	3	4	3	2	4	1	3	3	5	0	5	2		0	6	0	0	0	6	6	3	0	1	0	0	0	0	0	1	3
82	1	65	1	9	8	1	1	1	0					0	0	2	1	2	2	4	2	2	0	5	0	2	2	1	0	5	0	0	4	0	3	0	1	1	0	0	0	0	0	1	1		13
329	1	66	1	11	8	1	1	4	0					0	4	1	3	1	2	3	2	2	3	5	2	2	2	1	0	1	0	0	0	0	1	0	0	0	0	0	0	0	0	0	8		14
150	1	66	1	29	8	1	1	1	0					0	3	2	0	1	2	2	1	3	0	5	0	1	0			0	0	0	0	0	0	3	1	0	0	1	0	1	0	1	12		1	14
3084	0	67			8	1	1	1	1	15	40		36	5	0	2	1	3	2	2	2	2	2	5	4	2	1	1	2	6	2	0	0	0	0	3	1	0	0	0	0	0	0	1	8		18
40	1	67	1	25	8	1	1	1	0					0	0	2	2	2	2	2	1	2	2	5	2	2	2	1	0	1	4	2	1	1	0	6	1	1	0	0	0	1	0	1	1		1
275	1	67	1	16	8	1	0	1	0					0	1	1	2	1	2	2	1	2	2	5	1	2	1			2	2	0	0	2	0	2	0	0	0	0	0	0	0	0
200	1	67	1	17	8	1	1	1	0					0	0	2	1	1	1	2	2	2	1	5	1	2	0			5	2	0	3	0	5	3	1	0	0	0	0	0	0	1	21		1	14	11
231	1	69	1	17	8	1	1	1	0					0	0	1	3	2	3	2	0	2	0	5	0	0	0			7	2	0	0	3	0	0	1	1	0	0	1	0	0	1	53			0	6
2104	1	70	1	27	8	1	0	0	0					5	0	2	1	3	1	1	2	2	1	5	2	2	3	1	0	0	0	0	0	0	0	0	1	1	1	0	0	0	0	1	16		12		11
11	0	72			8	1	1	1	1	8	20	1957	25	5	1	2	1	1	2	3	1	2	1	5	1	3	1	1	1	1	0	6	0	1	5	2	0	1	0	1	0	0	0	0	0	17
176	0	72			8	1	1	1	0					0	1	1	3	1	2	2	3	1	0	5	1	0	0			5	0	3	0	5	5	2	1	0	0	0	0	0	0	0	10		1	0
2088	1	74	1	25	8	1	1	1	0					0	0	2	3	2	1	2	1	1	1	5	2	4	0			7	0	0	0	3	0	2	1	1	0	0	0	0	0	1	20		18	1	11
284	1	75	1	26	8	1	1	3	0					0	0	1	3	3	2	2	2	2	2	5	1	5	0			3	0	1	0	0	0	0	1	1	0	0	0	0	0	1	8		1
48	0	84			8	1	0	1	1	60				5	1	1	2	1	1	3	1	1	1	5	1	4	2	1	0	0	0	0	0	3	2	2	0	1	0	0	0	0	0	1
89	1	84	1	34	8	1	1	0	0					0	0	2	1	3	1	2	3	2	3	5	1	2	0			3	0	3	0	3	3	0	1	0	0	0	0	0	0	1	12		14	0
47	1	86	1	40	8	1	1	0	0					0	1	2	2	2	2	3	1	3	1	5	2	3	0			0	0	0	0	0	0	6	1	1	0	1	0	0	0	0	15		1		5
247	0	54			8	1	1	1	1	7				5	1	2	3	1	3	3	3	3	0	5	3	3	2	0		0	0	0	0	0	0	3	1	1	0	0	0	0	0	1
3033	0	58			8	1	1	3	0					3	0	2	1	1	2	2	1	2	0	5	4	1	3	1	0	2	2	0	1	2	0	6	1	1	0	0	0	0	0	0	20		0	1	11
152	0	64			8	1		1	1	15			50	0	0	3	3	3	2	4	0	0	0	5	0	1	1	1	1	3	0	0	0	0	0	0	1	1	0	1	0	0	0	1	14	6			8
3083	1	64	1	26	8	1	1	1	0					0	0	1	3	3	2	1	2	2	3	5	3	1	0			5	0	0	1	1	5	0	1	1	0	0	0	0	0	1	8		18
29	1	65	1	12	8	1	0	1	0					0	1	2	2	2	2	3	1	2	0	5	2	3	1	1	1	5	5	0	1	5	1	6	1	1	0	0	0	0	0	1
264	0	68			8	1	1	1	1	30		1965	18	0	0	1	3	3	3	2	2	2	3	5	2	0	1	1	1	3	0	0	0	0	0	2	1	0	0	0	0	0	0	0	1		1
147	0	79			8	1	1	1	1	15	40	1950	30	4		2	3	3	3	4	3	2	1	5	2	2	2	1	1	0	0	0	0	0	0	0	1	1	0	0	0	0	0	1	0	3
3079	1	80	1	28	8	1	1	3	1	30	10		43	0	4	1	3	3	2	2	1	2	0	5	0	1	3		1	7	0	4	0	0	5	4	1	1	0	0	0	0	0	1	12		14	0
357	0	15			7	1	0	3	0					0	1	2	2	2	2	4	2	2	2	5	2	3				6	0	0	0	0	7	5	0	0	0	0	0	0	0	1
318	0	16			7	1	0	2	0					0	1	1	2	1	2	2	3	2	1	5	1	3	2	0	2	0	0	0	0	0	1	4	0	0	0	0	0	0	0	0
122	1	26	1		7	1	1	1	0					0	3	1	2	1	2	2	1	2	1	5	3	5	0			2	0	0	2	2	0	3	0	0	0	0	0	0	0	0
2038	1	39	0		7	1	0	3	0					0	1	0	4	3	2	2	1	3	3	5	1	0	1	1	1	0	0	1	0	2	0	0	1	0	0	0	0	0	0	0	8		5
166	0	45			7	1	0	4	0					0	1	1	3	2	2	2	3	2	0	5	2	2	1	1	2	1	0	0	0	0	3	7	0	0	0	0	0	0	0	0
33	1	49	1	2	7	1	0	2	0					0	1	1	3	3	2	2	2	2	3	5	3	4	1	1	1	7	0	0	5	2	0	0	1	1	0	0	0	1	0	1
144	0	54			7	1	0	1	1	2				0	0	1	1	1	2	3	2	2	0	5	2	2	0			7	0	0	0	4	0	3	1	1	0	0	0	0	0	1	1		1
302	1	54	1	1	7	1	1	1	0					0	0	1	2	2	1	3	2	3	2	5	2	2	1	1	0	6	0	2	2	0	4	0	1	0	1	0	0	0	0	1
3088	0	55			7	1	1	3	1	1				0	3	1	2	3	2	2	2	2	0	5	3	2	2	1	2	4	0	0	4	0	0	6	1	1	0	0	0	0	0	1	21		1	1	8
3064	1	55	1	5	7	1	1	1	0					5	0	0	3	2	2	3	3	3	2	5	3	2	1	1	2								0	0	0	0	0	0	0	0
3054	1	55	1	2	7	1	1	3	0					5	0	2	4	4	2	2	2	1	0	5	1	2	3	1	1	0	0	0	0	1	0	3	0	0	0	0	0	0	0	0
3068	0	57			7	1		4	1	20	50		39	4	1	2	0	1	2	3	1	2	3	5	0	1	2	1	2	4	0	0	0	0	1	0	1	0	0	0	0	0	0	0	12		1	0
7	1	58	1	5	7	1	0	1	0					0	0	1	4	1	2	3	2	2	2	5	2	4	1	1	2	6	0	7	6	2	6	6	0	1	0	0	0	1	0	1
243	1	60	1	5	7	1	0	2	0					0	1	2	2	2	3	4	2	0	1	5	2	1	2	1	1	0	0	0	3	0	0	0	0	1	0	0	0	0	0	1
27	0	61			7	1	0	0	0					4	1	2	2	2	2	3	2	2	0	5	1	1	2	1	0	6	0	0	6	2	3	6	1	1	0	0	0	0	0	0	10		1	0
3081	1	61	1	9	7	1	1	1	0					0	1	2	4	1	2	3	1	2	2	5	1	2	1	1	2	5	0	0	3	6	0	6	0	0	0	0	0	0	0	1
2027	0	64			7	1	1	3	0					5	1	1	3	3	1	3	1	2	3	5	3	1	1	1	1	7	2	0	5	5	1	6	1	1	0	0	0	1	0	1	20		1	0	5
263	1	66	1	16	7	1	1	1	0					0	1	1	2	2	1	2	2	2	1	5	2	5	1	1	2	0	0	0	0	0	1	0	0	1	0	0	0	0	0	1
160	1	66	1	17	7	1	1	1	0					0	2	2	3	2	2	4	2	2	0	5	1	2	1	1	1	7	5	0	5	5	5	0	0	1	0	0	0	0	0	1
54	0	67			7	1	1	3	1	20	50		20	5	0	1	1	1	2	2	3	2	4	5	3	3	1	0	0	0	0	0	3	3	0	0	0	0	0	0	0	0	0	1
3022	0	67			7	1	0	2	1	40	20	1959	15	0	1	0	0	3	2	2	3	3	0	3	0	0	1	1	2	5	0	0	3	0	0	0	1	1	1	1	0	0	0	1	47				5
164	0	69			7	1	0	1	1				46	0	1	2	1	1	2	3	2	2	0	5	2	2	0			6	0	0	0	1	0	2	1	0	0	0	0	0	0	1	4				11
180	0	70			7	1	1	1	1	30	40	1955	27	5	1	2	3	3	2	4	2	2	0	5	3	2	0			3	0	0	0	0	3	0	0	0	0	0	0	0	0	0
20	0	76			7	1	1	1	1	25				5	3	0	3	2	2	4	2	3	3	5	2	0		1	0	3	0	3	5	5	0	6	1	1	1	1	0	0	0	1	12		10	15
77	0	80			7	1	1	0	0					0	2	0	2	1	2	2	1	2	2	5	1	0	1	1	0	5	0	0	0	5	0	0	1	0	1	0	1	0	0	0	12		5	14
22	1	80	1	42	7	1	1	0	0					0	3	1	4	2	2	2	2	1	3	5	0	2	1	1	1	3	0	0	5	0	5	6	1	1	0	0	0	0	0	1	8		5
85	1	81	1	36	7	1	1		0					0	0	1	3	3	0	2	2	3	3	5	0	3	0			7	4	0	1	6	0	0	1	1	1	1	1	0	2	1	4				5
3066	1	82	1		7	1	0	0	0					5	0	2	3	1	1	2	1	3	3	5	2	5	0			7	2	0	5	0	0	3	1	1	0	0	0	0	2	1	8		11
3058	0	86			7	1	1	2	0					5	0	2	3	3	2	3	2	2	0	5	3	5	1	1	1	6	0	0	0	6	0	6	1	1	0	0	0	0	0	1	11	12		23
71	1	86	1	30	7	1	0	0	0					0	1	2	3	2	2	4	2	2	0	5	2	0	0			2	0	0	0	3	0	3	0	1	1	0	0	0	0	0	8		9
2029	1	47	0		7	1	0	4	0					5	1	1	3	3	2	2	0	1	3	5	3	2	2	1	1	1	0	0	5	0	0	3	0	0	0	0	0	0	0	1
290	0	49			7	1	0	1	0					3	0	1	0	3	2	2	2	2	0	5	1	1	0			1	0	0	5	0	0	2	1	0	0	0	0	0	0	0
67	1	60	1	20	7	1	0	1	0					0	0	1	3	1	2	4	2	3	3	5	0	3	1	1	2	5	0	0	0	0	2	1	1	0	1	0	0	0	0	0	11	18		14
215	0	62			7	1	1	1	1	30	50	1966	14	3	1	2	3	3	2	3	3	3	1	5	1	1	0			4	0	2	7	0	0	6	1	1	0	0	0	0	0	1	13		1		11
295	1	70	1	17	7	1	0	1	0					0	1	2	3	2	2	3	2	2	2	5	2	1	0			1	0	2	3	0	0	6	0	1	0	0	0	0	0	1	1		10
3065	0	71			7	1	1	1	1	15				3	0	3	1	1	2	2	2	2	0	5	3	1	1	1	2	1	0	0	0	0	0	6	1	0	0	0	0	0	0	1
3109	1	71	1	21	7	1	0	0	1	46				0	0	1	1	3	2	1	2	2	3	5	3	1	1	1	2	5	5	0	0	2	0	2	1	1	0	0	0	0	0	0	21		1	15	11
342	1	16	0		6	1	1	2	0					0	1	3	3	2	0	1	1	0	0	5	0	4	0			0	0	0	2	0	1	4	0	0	0	0	0	0	0	0
369	1	39	0		6	1	1	4	0					0	3	2	3	3	2	2	2	2	3	5	3	5	2	1	0	0	0	1	0	2	0	0	0	0	0	0	0	0	0	1
2036	1	45	0		6	1	1	4	0					0	0	1	4	2	2	4	4	4	2	5	3	1	1	1	0	4	0	0	4	0	0	2	0	0	0	0	0	0	0	1
3028	0	50			6	1	0	3	0					3	3	5	4	5	2	5	0	0	0	5	0	0	1	1	1	2	2	0	0	0	0	0	0	1	0	0	0	0	0	0
59	0	51			6	1	1		1	2	60		30	5	1	2	1	1	2	4	1	2	0	5	1	1	1	1	2	4	1	0	4	4	1	3	0	1	0	1	0	0	0	1	4				5
32	0	57			6	1	1	1	1	10	55		20	3	1	1	3	3	0	2	3	2	3	5	3	2	1	1	1	1	0	0	1	1	5	2	0	1	1	0	0	0	0	1
3003	1	59	1	35	6	1	1	3	0					0	1	0	5		1	2	2	3	0	4	2	5	1	1	0	1	0	1	0	0	0	0	0	1	1	0	0	0	0	1
151	1	62	1	20	6	1	0	1	0					0	0	2	2	2	2	4	1	1	0	5	0	1	0			1	0	0	0	3	0	3	1	1	0	0	0	0	0	0	8		11
87	0	65			6	1	1	3	1				35	0	0	2	2	4	3	5	1	0	2	5	2	2	1			6	0	0	6	6	2	0	1	0	0	0	0	0	0	1	1		12
169	0	66			6	1	1	1	0					0	2	1	2	2	2	2	2	4	0	5	1	1	1	1	2	6	1	3	3	0	0	3	1	1	0	1	0	0	0	1	15		1		11
355	1	66	1	20	6	1	0	3	0					0	2	1	1	2	2	2	1	2	2	5	0	1				0	0	0	0	0	1	6	0	1	0	0	0	1	0	1
3082	1	66	1	16	6	1	1	1	0					0	5	1	4	1	2	2	2	2	0	5	3	3	1	1	0	7	0	0	1	0	0	6	1	1	0	0	0	0	0	1
3002	1	69	1	18	6	1	1	4	0					5	3	1	4	3	2	4	1	2	3	3	4	2	1	1	1	0	0	0	0	0	0	0	1	1	0	0	0	0	0	0	8		1
149	1	69	1	10	6	1	1	2	1	20				0	2	1	2	2	2	4	1	2	0	5	2	2	0			3	0	0	0	0	0	0	1	0	1	0	0	0	0	0	8		1
244	0	70			6	1	0	1	0					0	2	2	2	2	2	4	1	2	2	5	1	1	1	1	0	3	1	6	0	1	3	6	0	0	0	0	0	0	0	1
3001	0	71			6	1	1	4	1	30				5	4	0	4	3	2	4	1	2	0	5	1	3	1	1	1	4	0	0	0	1	2	0	1	1	0	0	0	0	0	1	10		1	0
3073	0	72			6	1	1	1	1	20				5	1	2	3	2	2	4	2	2	0	5	1	2	1	1	1	0	0	0	0	0	0	2	0	1	1	0	0	0	0	0
163	0	72			6	1	0	1	1	52				5	1	2	1	1	2	3	1	1	0	5	0	1	1	1	0	0	0	0		0	0	0	0	0	0	0	0	0	0	1	8		14
217	0	74			6	1	1	3	1	45	10	1955	12	5	0	2	2	3	1	2	2	2	1	5	2	2	1	1	2	1	2	0	0	1	1	6	0	0	0	0	0	0	0	1
83	1	75	1	35	6	1	1	0	0					0	0	2	2	1	1	4	1	2	1	5	2	2	1	1	2	7	2	0	3	3	0	3	1	1	1	0	0	0	0	1	0	16
70	1	76	1	35	6	1	1	1	0					0	0	1	1	1	1	5	2	2	0	5	2	1	1			7	0	0	0	5	3	6	1	1	0	0	0	0	0	1	16		5		8
211	0	78			6	1	1	0	0					0	1	2	0	2	2	4	1	3	0	5	2	1	0			0	1	0	0	0	0	2	1	0	0	0	0	0	0	1	8		1
291	1	79			6	1	0	1	0					5	0	1	3	3	2	4	3	2	3	5	3	3	0			3	0	0	3	3	7	0	1	1	1	0	0	0	0	1	9	16		0
222	0	80			6	1	1	0	1	20	40	1974	15	5	1	2	3	2	2	4	3	1	0	5	1	3	1	1	0	1	0	1	0	5	0	2	0	0	0	0	0	0	0	1
24	0	81			6	1	0	0	1	30				1	0	2	4	1	3	2	2	2	0	5	3	0		0	0	0	0	0	0	1	1	6	1	0	0	1	0	0	0	1	16		6		11
319	1	53	1	2	6	1	1	3	0					0	0	1	1	1	3	2	2	2	0	5	1	2	0			5	0	0	0	1	1	2	1	0	0	0	1	0	0	1
101	0	67			6	1	1	1	0					0	2	2	3	1	2	2	1	2	1	5	2	2	1	1	1	3	0	0	3	0	0	3	1	1	0	1	0	0	0	0	4				8
307	0	74			6	1	0	2	0					5	1	1	3	3	2	5	1	1	3	5	2	1	0			0	0	0	0	0	0	6	0	0	0	1	0	0	0	1	1		10
162	1	79	1	24	6	1	0	0	0					0	1	2	3	3	2	3	1	2	1	5	1	2	1	1	0	2	0	2	0	0	0	0	1	0	0	1	0	0	0	1	16		6		5
8	1	58	1	2	5	1	1	1	0					0	0	1	1	1	2	2	1	3	2	5	1	4	1			5	0	0	1	0	3	2	0	1	0	0	0	0	0	0
181	1	66	1	13	5	1	1	1	0					5	0	2	2	0	1	4	4	4	0	5	1	0	0			2	1	0	0	0	1	0	0	0	1	0	0	0	0	1	4				8
15	1	67	1	15	5	1	1	1	0					0	2	1	1	3	2	3	1	2	1	5	1	2				0	0	0	0	0	6	3	1	0	0	1	0	1	0	1	8		14
192	1	68	1	19	5	1	1	1	0					0	0	2	2	3	2	3	2	2	3	5	2	3	1	1	0	4	0	4	2	2	2	3	1	1	0	1	0	1	1	1	47				8
175	1	71	1	30	5	1	1	1	0					0	1	2	2	2	2	3	2	2	0	5	1	2	0			3	0	0	3	0	3	2	0	1	0	0	0	0	0	0
3097	1	72	1	36	5	1	0	0	0					0	0	2	3	2	2	1	2	1	0	5	3	5	1	1	0	5	1	0	0	5	0	0	1	0	1	0	0	0	0	1	10		15	0
121	1	73	1	30	5	1	0	1	0					0	2	1	2	2	2	2	3	3	2	5	2	3	1	1	2	6	2	0	0	1	5	6	0	0	0	0	0	1	0	1
119	1	74	1	24	5	1	0	0	0					0	0	1	4	1	0	2	2	2	2	5	3	2	1	1	0	0	2	3	0	0	0	6	0	1	0	0	0	0	0	1
1	0	76			5	1	1	0	1	25	20	1978	65	5	0	1	2	2	2	2	2	2	1	5	1	1	0	1	2	6	4	0	3	0	0	3	1	1	0	1	0	0	0	1	10		6	14
9	1	78	1	28	5	1	0	1	0					5	0	1	2	0	2	2	1	2	3	5	1	2	2		0	0	0	0	3	0	0	3	1	0	0	0	0	0	2	1			1	0
2037	1	80	1	30	5	1	0	0	0					0	0	2	1	1	0	4	1	3	0	5	1	2	0			3	0	0	3	6	0	0	0	0	0	1	0	0	0	1	15		0		7
95	1	82	1	40	5	1	1	0	0					0	2	1	2	1	2	5	2	2	2	5	0	2	1	1	0	3	0	0	0	0	1	0	1	0	0	0	0	0	0	1	45			0	5
296	0	53			4	1	1	1	1	24				0	2	1	0	1	0	4	2	0	0	5	2	1	1	1	2	2	0	0	1	0	0	2	1	1	1	0	0	0	0	0
3009	0	73			4	1	1	0	1	1				3	1	0	0	1	0	4	0	2	0	3	3	0	1	1	0	0	0	1	0	0	0	2	1	0	0	0	1	0	1	1	45			1	8
210	1	78	1	30	4	1	1	0	0					0	1	0	2	2	2	2	1	2	2	5	1	0	0			0	0	0	0	0	0	0	1	1	1	0	0	0	0	1	21		1	0	2
280	1	72	1	20	3	1	0	1	0					0	0	1	2	3	2	4	3	0	2	5	2	0	0			0	0	0	3	0	0	0	1	1	0	0	0	0	0	1	20		1	0	2
196	1	78	1	37	3	1	0	1	0					0	1	2	0	1	2	0	2	2	3	5	1	0	2	1	0	0	0	0	0	0	0	0	1	1	1	0	1	0	0	1	8		6
2	1	79	1	20	3	1	1	1	0					0	0	1	1	1	1	1	1	3	1	5	1	1	0			7	0	0	6	0	0	2	1	1	0	0	0	0	0	1	12		6	14
92	1	86	1	37	3	1	0	0	0					0	2	1	3	3	2	3	2	2	2	5	1	1	0			5	1	0	3	0	3	3	1	1	0	1	0	0	0	1	21		5	14	5
2023	0	19				1	0		0					5	1	3	2	3	2	5	2	5	3	5	2	1	1	0	2	0	0	0	0	0	0	7	0	0	0	0	0	0	0	0
356	1	16	0		15	0	0	3	0					0	2	1	2	1	0	3	5	4	2	5	2	2	2	1	0	1	0	0	0	0	1	2	0	0	0	0	0	0	0	1
2053	1	30	0		13	0	0	2	0					5	0	2	0	2	1	3	0	0	2	5	1	2	1	1	0								0	0	0	0	0	0	0	0
2042	0	33			12	0	0	3	0					5	1	2	2	3	2	4	2	4	3	5	1	5	1	1	0	4	0	2	2	2	0	3	0	0	0	0	0	0	0	0
216	1	74	1	19	12	0	1	3	0					0	0	2	2	3	1	2	2	2	0	5	2	2	1	1	2	1	0	2	0	2	2	6	1	1	0	0	0	0	0	1	1		14
316	0	15			10	0	1	2	0					0	1	1	0	1	2	2	4	4	2	5	2	3	1			0	0	0	0	0	0	0	0	0	0	0	0	0	0	0
362	0	15			10	0	0	1	0					0	1	2	1	1	2	2	2	2	3		5	2	0	1	1	0	0	0	2	2	0	4	0	0	0	0	0	0	0	0
339	0	15			10	0	0	2	0					0	2	2	2	1	3	4	4	4	4	5	2	2	1	0		0	0	0	0	0	0	2	0	0	0	0	0	0	0	0
315	0	15			10	0	1	2	0					0	0	2	0	0	2	0	4	4	2	5	2	3	1			0	0	0	0	0	0	0	0	0	0	0	0	0	0	0
2059	1	15	0		10	0	0	2	0					0	0	2	2	0	2	3	0	3	3	5	1	2	2	0	0	0	0	0	1	0	0	3	0	0	0	0	0	0	0	0
2111	0	18			10	0	1	3	0					0	0	2	1	1	1	0	1	2	1	5	1	4	1	0	0	1	0	0	0	0	1	0	0	0	0	0	0	0	0	1
2048	1	35	0		10	0	0	2	0					0	1	2	0	3	2	4	4	2	0	5	4	2	1	1	0	7	0	0	7	2	6	3	1	0	0	0	0	1	0	0	1		13
2063	0	15			10	0	0	2	0					0	0	2	2	3	2	3	3	4	3	5	3	1	2	0	0	1	0	0	0	0	0	0	0	0	0	0	0	0	0	0
2066	0	15			9	0	0	2	0					0	0	2	1	0	1	2	2	3	3	5	1	1	1	0	0								0	0	0	0	0	0	0	0
325	0	15			9	0	1	2	0					0	2	2	1	1	2	4	1	2	2	5	2	3	1	0		0	0	0	0	0	1	4	0	0	0	0	0	0	0	0
249	1	23	0		9	0	0	4	0					0	1	2	2	0	2	3	1	3	2	5	0	3	1	1	0	0	0	0	0	0	0	0	0	0	0	0	0	0	0	0
3092	1	23	0		9	0	0	3	0					5	0	1	0	0	3	0	3	3	0	5	1	5	2	1	1	0	0	0	4	0	0	5	0	0	0	0	0	0	0	0
3050	0	26			9	0	0	4	0					5	0	1	0	2	1	3	2	3	0	5	3	2	3	1	1	0	0	0	0	0	0	2	0	0	0	0	0	0	0	0
299	1	37	0		9	0	0	3	0					5	3	2	3	4	2	5	2	2	3	5	2	2	1	1	0	4	0	0	1	0	0	6	0	0	0	0	0	0	0	0
46	1	45	0		9	0	1	2	0					0	1	1	1	3	2	3	2	2	3	5	2	5	1	0	0	0	0	0	0	0	0	0	0	0	0	0	0	0	0	1
314	1	16	0		9	0	1	2	1		8	2011	1	0	0	1	2	3	1	1	4	4	1	5	3	3	2	0	2	0	0	0	0	0	0	1	0	0	0	0	0	0	0	1
3026	1	44	0		9	0	1	3	1	1	80	1993	20	4	4	3	0	2	1	2	3	3	0	4	2	1	1	1	1	0	0	0	0	0	0	2	0	0	0	0	0	0	0	1
112	0	15			8	0	0	3	1	20	20		16	5	0	1	1	3	1	1	3		3	5	2	1	2		0	1	0	0	0	0	1	2	0	1	0	0	0	0	0	0
2009	0	15			8	0	1		0					0	2	2	2	1	2	1	3	3	3	5	2	4	1	1	2	0	0	0	0	0	0	2	0	0	0	0	0	0	0	0
321	1	15	0		8	0	1	2	0					0	3	1	1	3	2	2	3	2	3	5	3	5	2	0	1	0	0	0	1	0	0	0	0	0	0	0	0	0	0	0
2068	1	15	0		8	0	0		0					0	2	2	3	3	2	3	2	2	3	5	0	3	1	0	0								0	0	0	0	0	0	0	0
360	0	15			8	0	0	1	0					0	3	2	3	2	2	3	2	2	3	5	3	0	1	0	2	1	0	0	1	0	2	4	0	0	0	0	0	0	0	1
347	0	15			8	0	1	1	0					0	3	2	3	2	2	2	3	2	3	5	0	3	1	0	2	0	0	0	0	0	2	4	0	0	0	0	0	0	0	0
323	0	15			8	0	1	1	0					0	1	1	2	2	2	2	2	2	1	5	3	2	2	0	2	0	0	0	0	0	0	1	0	0	0	0	0	0	0	0
2067	1	15	0		8	0	0		0					0	1	2	3	3	1	4	1	2	3	5	3	1	1	0	0	0	0	0	0	0	0	0	0	0	0	0	0	0	0	0
3038	0	16			8	0	0	1	0					5	0	1	1	4	2	2	3	3	4	5	3	5	1	0	2	2	0	0	0	0	1	1	0	0	0	0	0	0	0	0
364	1	32	0		8	0	0		0					5	2	0	1	2	2	1	1	2	2	5	2	1	0			0	0	0	1	2	0	6	0	0	0	0	0	1	0	0
327	1	38	0		8	0		4	0					0	0	1	2	2	2	2	2	2	1	5	3	3	2		1	4	0	0	0	0	1	0	0	0	0	0	0	0	0	1
228	1	42	0		8	0	0	3	1	3				0	1	1	2	2	1	2	1	1	2	5	2	2	2		0	2	0	2	4	1	0	2	0	0	0	0	0	0	0	0
2075	1	44	0		8	0	0	3	0					0	2	1	4	4	2	3	1	2	3	5	2	3	1	0	0	0	0	0	0	0	0	0	0	0	0	0	0	0	0	0
375	0	45			8	0	1	4	1	10	15	1984	18	5	0	1	3	3	2	2	2	2	3	5	3	2	2	0	2	1	2	2	4	0	4	6	0	0	0	0	0	0	0	0
248	1	46	0		8	0	1	3	0					0	0	2	2	2	2	2	2	2	1	5	2	5	0			1	1	0	4	0	0	0	0	0	0	0	0	0	0	1
214	1	51	1		8	0	1	1	0					5	1	2	3	3	2	3	3	3	3	5	1	4	0			1	0	1	0	0	2	0	0	0	0	0	0	0	0	1
233	1	53	0		8	0	1	1	0					0	0	1	1	3	2	4	2	1	1	5	1	1	0			1	0	2	3	0	0	6	0	0	0	0	0	1	0	1
3032	1	53	1	18	8	0	1	0	0					0	2	1	2	3	2	2	2	2	0	5	3	5	2	1	1	7	0	0	0	0	0	0	0	1	0	0	0	0	0	0
2098	0	54			8	0	0	0	1	2				0	0	3	1	1	2	2	0	3	3	5	2	3	1	1	1	1	0	0	1	0	0	0	0	0	0	0	0	0	0	1
2026	0	56			8	0	0	4	1	20				5	0	2	4	0	1	5	0	3	0	5	1	2	1	1	1	4	2	2	1	1	1	0	1	1	0	0	0	0	0	1
105	1	59	1	15	8	0	1	1	0					0	1	1	3	3	2	3	2	2	3	5	2	1	0			2	1	0	0	0	2	6	1	1	0	0	0	0	0	0	8		18
2076	1	60	1	15	8	0	1	3	0					5	0	2	1	1	1	1	2	2	3	5	2	1	0			2	0	2	0	2	1	2	0	0	0	0	0	0	0	1
97	1	63	1	13	8	0	1	1	0					0	3	1	4	2	2	3	2	3	3	5	0	0	0			5	0	0	3	1	5	3	1	1	1	0	0	0	0	1	12		1	0
2062	1	64	1	10	8	0	1	1	0					5	0	2	3	1	2	4	1	3	1	5	1	5	0			5	0	1	3	1	1	2	1	1	0	0	0	1	0	1	7	6
56	1	64	1	12	8	0	0	1	0					5	2	2	2	1	2	4	1	1	1	5	1	2	1	1	1	1	0	0	0	0	0	6	0	0	0	0	0	0	0	1
198	1	68	1	15	8	0	1	1	0					0	0	1	1	2	2	1	2	2	3	5	1	3	0			7	0	3	0	0	0	0	0	1	0	0	0	0	0	0
3013	1	46	0		8	0	1	0	0					0	0	3	0	1	1	2	2	3	1	5	1	5	0			0	0	2	3	0	0	7	0	0	0	0	0	0	0	1
212	0	58			8	0	1	2	1	10				5	0	1	2	3	2	3	2	2	2	5	2	3	1	1	2	0	0	0	1	0	0	2	0	1	0	0	0	0	0	1
328	0	72			8	0	1	3	1	27				5	0	1	4	2	2	3	1	2	1	5	1	1	0			1	0	1	0	0	0	6	1	0	0	0	0	0	0	1	8		9
361	1	15	0		7	0	0	2	0					0	2	1	2	1	2	3	3	3	2	5	2	2	1		1	0	0	0	0	0	0	4	0	0	0	0	0	0	0	1	0	5
224	0	19			7	0	0	3	0					0	0	2	2	1	2	4	2	4	0	5	2	1	0			0	0	0	0	1	1	2	0	0	0	0	0	0	0	0
57	0	20			7	0	1	4	0					0	0	2	1	3	2	2	3	3	3	5	1	3	0			2	0	2	2	0	0	2	0	0	0	0	0	0	0	1
3091	1	22	0		7	0	0	4	1	1			7	5	1	2	1	2	2	1	1	3	0	5	2	5	1	1	0	0	0	0	0	0	0	2	0	0	0	0	0	0	0	0
331	1	24	0		7	0	0	3	0					0	1	1	3	3	2	2	2	2	3	5	0	2	2	1	1	2	0	0	0	0	1	2	0	0	0	0	0	0	0	0
349	1	24	0		7	0	1	4	0					0	0	1	2	2	2	2	2	2	0	5	2	3	0			1	0	0	1	0	2	0	0	0	0	0	0	0	0	1
118	1	29	0		7	0	1	4	0					0	0	1	1	1	3	1	2	2	0	5	1	3	2		1	0	0	0	2	2	0	1	0	0	0	0	0	0	0	1
2114	1	30	0		7	0	1	3	0					0	0	3	1	3	2	3	2	2	2	5	3	5	0			0	0	0	0	0	0	2	0	0	0	0	0	0	0	0
300	1	34	0		7	0	0	3	0					0	0	1	4	3	1	2	2	2	3	5	3	1	1	1	2	0	0	0	0	0	1	3	0	0	0	0	0	0	0	0
374	1	35	0		7	0	0	4	0					0	1	0	2	2	3	3	2	2	0	5	0	1	1	1	1	2	0	4	2	0	5	6	0	0	0	0	0	1	0	0
2086	1	36	0		7	0	0	4	0					5	2	1	3	3	1	2	1	2	3	5	2	1	2	0	1	2	0	0	1	0	0	4	0	0	0	0	0	0	0	0
154	0	39			7	0	1	3	1	4	60	1993	15	5	1	1	1	3	2	2	2	2	1	5	2	3	2	0	0	0	0	0	0	0	3	2	0	0	0	0	0	0	0	0
2082	1	39	0		7	0	1	3	0					5	0	2	1	2	2	2	1	3	3	5	2	4	3	1	0	4	2	0	0	1	2	0	0	0	0	0	0	0	0	0
2102	0	40			7	0	0	3	1	3				5	0	3	1	2	1	2	1	4	1	5	1	2	2	1	1	4	0	2	1	1	0	3	0	0	0	0	0	0	0	1
2043	1	41	1		7	0	0	2	0					5	1	2	3	3	1	2	2	1	3	5	2	5	3		0	4	0	0	7	4	6	6	0	1	0	0	0	1	0	1
2008	1	42			7	0	0	3	0					5	2	2	1	1	3	1	2	2	2	5	3	2				4	2	0	4	4	1	4	0	0	0	0	0	0	0	1
50	0	43			7	0	1	3	1	5	55		12	0	0	1	3	2	1	3	3	3	0	5	1	3	1	1	1	2	0	0	2	0	0	2	0	0	0	0	0	0	0	1
155	0	46			7	0	0	2	1	4				5	0	2	3	3	2	5	2	2	1	5	2	0	1	0	0	1	2	1	0	0	0	0	0	0	0	0	0	0	0	1
35	1	46	0		7	0	1	1	0					5	2	1	4	3	1	3	2	3	3	5	2	2	1	1	2	0	0	0	0	0	0	3	0	1	0	0	0	0	0	0
94	1	58	1	14	7	0	0	1	0					5	3	1	3	1	2	3	2	2	3	5	3	5	1	1	1	5	0	0	5	0	0	3	1	1	0	0	0	0	0	1	1		16
3107	0	61			7	0	1	3	1	25				5	0	1	3	3	2	2	2	2	0	5	1	5	1			7	0	2	7	2	0	0	1	0	0	0	0	0	0	0	10		6	10
100	0	62			7	0	1	1	1	13	50		20	3	0	2	1	1	2	4	2	2	0	5	2	3	0			0	0	0	0	0	0	6	0	0	0	0	0	0	0	1
68	1	62	1	12	7	0	0	2	0					0	3	1	3	3	2	3	1	1	3	5	1	3	1	1	0	0	0	0	0	0	0	3	0	0	0	0	0	0	0	0
225	0	68			7	0	1	4	0					0	0	1	3	3	2	3	2	2	0	5	1	0	2	1	1	1	0	1	0	5	1	2	1	0	1	0	0	0	0	1	1		12
271	1	28	0		7	0	0	3	0					0	0	1	1	3	2	2	3	3	1	5	2	4	0			0	0	0	0	0	0	6	0	0	0	0	0	0	0	0
183	1	35	0		7	0		1	1	10	20		4	0	2	1	1	3	2	3	2	1	3	5	3	5	1	0	0	4	0	2	5	2	2	0	0	0	0	0	0	0	0	0
258	1	56	1	5	7	0	0	3	0					0	0	1	4	4	2	2	2	2	1	5	3	3	1	1	1	1	0	0	5	1	4	2	0	1	0	0	0	0	0	1
178	0	57			7	0	0	3	1	3				0	2	2	0	3	2	3	2	2	3	5	2	3	0			0	0	0	0	0	0	3	0	0	0	0	0	0	0	0
221	1	58	1	6	7	0	0	1	0					5	1	1	2	3	1	3	2	3	3	5	1	2	0			7	0	2	3	0	0	0	0	1	0	0	0	1	0	1
38	1	66	1	16	7	0	0	1	0					0	3	2	3	2	0	4	2	2	0	5	2	2	2	1	1	5	1	3	3	5	0	2	1	1	0	0	1	0	1	1	8		1
66	1	68	1	8	7	0	0	1	0					0	3	1	1	2	2	3	2	2	0	5	1	3	1	1	0	4	0	0	2	3	5	3	0	1	0	0	0	0	0	0
341	0	19			6	0	0	3	0					0	0	2	3	2	2	1	1	1	0	5	0	4	1	0	2	0	0	0	0	0	0	4	0	0	0	0	0	0	0	0
3043	0	25			6	0	1	3	1	5				3	0	3	1	1	1	2	3	3	0	5	4	5	1	1	0	1	0	0	0	0	0	4	0	0	0	0	0	0	0	0
2089	0	34			6	0	1	4	1	1998				5	0	2	4	3	1	2	1	3	1	5	0	3	2	1	1	2	0	2	1	1	1	6	0	0	0	0	0	0	0	0
2103	1	34	0		6	0	0	3	0					0	0	2	1	0	1	0	1	2	1	5	3	5	0			0	2	0	0	1	0	2	0	0	0	0	0	0	0	1
287	0	39			6	0	0	4	0					5	0	0	2	1	0	2	4	3	0	5	0	1	1	1	2	1	0	0	0	0	0	0	0	0	0	0	0	0	0	0
261	1	39	0		6	0	0		1	6				0	1	1	3	3	2	2	2	3	3	5	3	5	1	0	0	2	0	0	7	2	3	6	0	0	0	0	0	0	0	0
191	1	39	0		6	0	1	1	0		25	1992	20	0	0	1	0	3	2	2	0	1	0	5	3	4	1	0	0	4	0	0	4	0	2	2	0	0	0	0	0	1	0	1
2013	1	40			6	0	0	4	0					0	3	1		1	1	1	2	2	3	5	3	5	2	0		1	0	2	1	0	0	2	0	1	0	0	0	1	0	1
2069	0	42			6	0	1	3	0					5	3	1	3	3	2	0	2	2	3	5	2	1	1	1	0	1	0	0	0	1	1	2	0	0	0	0	0	0	0	0
260	0	47			6	0	1	2	0					0	0	1	0	0	0	2	1	2	0	5	0	3	1	1	0	0	0	0	0	1	1	2	0	0	1	0	0	0	0	1
309	1	47			6	0	1	4	0					0	1	1	3	1	2	2	3	3	1	5	2	3	0			1	0	2	1	6	5	2	0	0	0	0	0	1	0	1
285	1	47	1	3	6	0	0	2	0					0	0	2	1	2	2	2	3	2	1	5	1	5	0			4	0	4	0	1	1	6	1	0	0	0	0	0	0	0
3103	0	49			6	0	1	3	1	10	35		33	5	1	1	1	2	2	2	2	2	0	5	2	1	1	1	0	0	1	0	2	0	0	6	0	0	0	0	0	0	0	0
2094	1	54	0		6	0	1	1	0					5	0	2	2	3	2	3	2	2	3	5	2	1	1	1	0	6	2	0	6	2	0	6	1	0	1	0	0	0	0	0	1		13
193	1	56	1	4	6	0	1	1	0					0	0	2	1	2	1	3	3	3	1	5	2	1	0			0	0	0	3	0	3	3	0	1	0	0	0	0	0	1
84	1	58	1	8	6	0	1	3	0					0	0	1	0	2	1	1	2	2	0	4	0	3	1	1	1	1	0	0	1	7	3	2	1	1	0	0	0	0	0	1
104	1	59	1	10	6	0	1	1	0					0	3	1	3	3	2	2	2	2	1	5	1	2	2		0	6	4	0	3	0	3	6	1	1	0	0	0	1	0	1	8		1
272	1	60	1	10	6	0	1	1	0					0	2	0	2	2	2	2	2	2	0	5	1	4	1			0	0	0	1	3	0	3	0	1	0	0	0	0	0	1
26	1	62	1	15	6	0	0	1	0					0	0	1	2	1	2	3	1	3	2	5	1	2	1	1	1	3	2	2	3	5	5		0	0	1	0	0	1	0	1
53	1	67	1	10	6	0	1	3	0					0	0	1	1	2	1	0	2	2	0	5	0	1	1	1	1	5	1	2	0	2	6	6	0	1	0	0	0	0	0	1
3069	1	69	1	35	6	0	1	1	0					0	0	1	4	2	1	3	1	3	2	5	2	3	0			0	2	0	0	0	0	0	1	1	1	0	0	0	0	1	10		1	0
3067	0	70			6	0	0	2	1	6				5	0	2	4	1	2	3	1	2	0	5	3	5	1	1	0	2	0	0	0	0	2	6	1	0	0	0	0	0	2	1	2			24
201	1	70	1	13	6	0	1	1	0					0	0	2	2	2	0	1	3	3	0	5	1	1	0			7	2	1	0	0	1	0	1	0	0	0	0	0	0	1	8		5
194	1	73	1	43	6	0	1	1	0					0	0	2	1	2	2	3	2	0	3	5	2	1	1	1	1	5	0	0	3	0	5	6	1	1	0	1	0	0	0	0	14	16			5
16	1	74	1	30	6	0	0	1	0					0	0	1	2	2	2	3	3	2	2	5	2	2	0		0	0	1	0	0	0	1	3	0	0	0	0	0	0	0	1
3093	0	34			6	0	1	1	0					5	3	3	4	3	1	2	4	2	1	5	4	5	1	1	0	0	0	0	0	0	0	7	0	0	0	0	0	0	0	0
213	1	54	1	2	6	0	0	2	0					0	0	1	2	3	2	3	2	2	0	5	2	3	2	1	1	1	0	4	0	2	1	0	1	0	0	0	0	0	0	1
55	0	59			6	0	0	1	1	20				5	0	0	3	2	2	4	0	1	1	5	1	4	1	1	2	0	0	0	0	0	0	0	1	1	0	1	0	0	0	1	4				11
115	1	64	1	15	6	0	0	1	0					0	3	0	3	3	2	2	1	1	3	5	0	3	0			7	0	0	5	1	1	0	1	1	0	0	0	1	0	1	8		11
3006	1	65	1	10	6	0	0	1	0					0	1	2	0	3	2	2	2	3	0	3	3	3	3		0						1	6	0	0	0	0	0	0	0	1	4
230	1	67	1	13	6	0	0	2	0					0	3	1	1	1	2	3	3	3	2	5	2	2	0			3	0	3	3	6	0	6	0	0	0	0	0	0	0	1
2017	1	68	1	20	6	0	0	0	0					0	0	2	0	2	2	2	0	0	0	5	3	0	0			1	0	0	1	0	5	6	1	0	0	0	0	1	0	1	31		1		6
3021	1	71	1		6	0	0	1	0					0	1	1	3	1	2	2	2	2	0	3	2	1	1	1	1	5	0	0	3	3	0	2	1	1	1	0	0	0	0	1	12		5	14
3060	0	72			6	0	1	1	1	40				5	0	1	4	4	3	4	2	1	3	5	3	3	1	1	1	0	2	0	1	6	0	6	1	0	0	0	0	0	0	0	8		11
333	1	36	0		5	0	0	2	0					0	2	1	2	1	2	1	2	2	0	5	2	4	0			1	0	0	0	0	0	0	0	0	0	0	0	1	0	1
25	1	50	0		5	0	1	2	0					0	3	3	2	2	2	3	3	1	0	5	1	3	1	1	1	1	1	1	0	1	4	2	1	0	0	0	0	0	0	1	32		5
3052	1	51	1	5	5	0	1	1	0					0	2	1	2	2	2	2	2	2	0	5	4	5	1	1	1	4	0	0	3	0	0	3	0	1	0	0	0	0	0	0
125	0	52			5	0	1	1	1				30	5	0	1	2	2	2	3	4	3	0	5	2	4	1	1	0	1	1	0	0	0	1	6	0	0	0	0	0	0	0	1
4	1	56	1	8	5	0	0	1	0					0	0	2	1	2	2	2	2	2	0	5	1	1	1		0	3	3	0	0	0	3	2	0	0	0	0	0	0	0	0
139	0	58			5	0	1	3	0					0	1	2	2	1	2	1	2	3	0	5	1	2	0			4	2	0	0	0	1	3	1	0	0	0	0	0	2	0	4				6
12	1	61	1	30	5	0	1	1	0					0	0	2	3	3	2	4		2	0	5	0	2	0			0	0	0	0	5	5	6	0	1	1	0	0	0	0	1
2070	1	63	1	12	5	0	1	1	0					0	0	2	0	0	1	4	2	2	0	5	5	5	0			7	0	0	6	7	1	2	1	1	1	0	0	0	0	1	0	16
129	0	65			5	0	0	2	0					5	1	1	5	3	0	4	1	2	3	5	1	3	1	1	1	7	0	0	3	0	2	2	0	0	0	0	0	0	0	0	8		5
13	1	66	1	20	5	0	1	1	0					0	0	1	1	1	2	3	0	2	0	5	2	1	1	0		5	0	0	1	1	1	0	1	1	0	0	0	0	0	1
2072	0	69			5	0	0	3	0					0	2	0	3	3	2	3	0	0	2	5	1	4	3	1	0	0	2	0	0	6	3	2	0	0	0	0	0	0	0	1
2006	0	73			5	0	1	1	0					5	0	4		1	3	1	2	2	1	5	5	1	1	1	1	0	0	0	0	5	1	3	0	0	0	0	0	0	0	1
109	0	74			5	0	1	2	1	12				5	3	0	3	1	1	1	2	2	3	5	2	0	2	1	0	3	3	0	0	0	3	3	1	1	1	0	0	1	1	1	4				8
98	0	75			5	0	0	0	0					5	2	1	2	0	1	3	0	3	0	5	3	1	1	1	0	3	0	0	0	2	1	0	1	1	0	0	0	1	0	1	2			1
107	0	78			5	0	0	0	1	42				5	2	1	1	1	1	3	2	3	1	5	1	0	1	1	2	3	0	6	0	0	3	6	1	0	0	0	0	0	0	1	0	22
93	0	79			5	0	1	0	1	12	20		50	5	0	2	1	1	2	4	2	0	0	5	1	2	0			3	0	0	3	1	0	3	1	0	1	0	0	0	0	1	11	2		10
23	1	84	1	30	5	0	1	0	0					0	0	0	1	1	2	0	2	2	2	5	2	0	0			2	0	0	0	0	0	0	1	0	0	0	1	0	0	1	14	17			5
3011	0	51			5	0	1	1	0					3	0	1	0	3	2	2	2	3	0	3	0	2	1	1	1	1	0	0	0	1	0	3	0	0	0	0	0	0	0	0
177	1	85	1	40	5	0	0	0	0					0	1	1	3	2	2	3	2	2	4	5	1	0	0			3	0	0	0	0	0	3	1	1	1	1	0	0	0	1	3
372	1	49	0		4	0	0	4	0					0	0	2	2	3	1	2	1		1	5	3	5	1	1	2	1	0	0	1	1	0	2	0	0	0	0	0	0	0	1
174	1	53	1	3	4	0	0	3	0					0	2	2	2	2	2	3	2	2	3	5	2	3	1	1	2	0	2	2	0	0	3	6	0	0	0	0	0	0	0	1
266	1	59	1	11	4	0	1	1	0					0	0	1	3	3	2	2	2	2	4		3	1	0			5	4	0	3	0	0	0	0	0	0	0	0	1	0	1
199	0	70			4	0	1	0	1	6				5	1	1	3	3	2	2	0	2	3	5	3	0	2	1	2	1	0	0	0	1	5	6	1	0	0	0	0	0	0	0	8		18
206	0	70			4	0	1	1	1	25				5	4	1	0	2	2	1	2	3	2	5	1	2	1		0	0	0	0	0	0	2	0	1	0	0	0	0	0	0	1
78	1	79	1	30	4	0	0	0	0					0	0	2	0	2	2	4	2	3	3	5	2	1	1	1	0	7	0	0	5	6	3	0	1	1	0	0	0	0	0	0	3
79	1	80	1	50	3	0	0	1	0					0	3	1	3	0	2	2	0	2	3	5	2	3	1	1	0	0	2	0	0	3	0	2	1	0	0	0	0	0	0	1	17	18		23	5
171	1	83	1	40	3	0	0	0	0					0	0	1	4	1	2	1	1	3	1	5	1	0	1	1	0	0	0	0	0	0	0	0	1	0	0	0	0	0	0	1	0	17
30	1	70	1	15	3	0	0	0	0					0	0	0	2	1	0	2	2	2	2	3	1	1	2	1	0	0	0	0	0	0	0	0	1	0	1	0	0	0	0	0
146	1	73	1	30	2	0	1	0	0					0	1	2	1	2	2	2	1	0	1	5	2	1	1	1	1	7	1	0	3	5	0	0	1	0	0	0	0	1	0	1	3
5	1	77	1	20	1	0	0	0	0					0	0	1	1	2	1	2	1	2	2	5	0	0	0			0	0	0	0	0	0	3	1	1	0	0	0	0	0	1	8		1
376	1	44	1	1		0	0	3	0					0	3	1	3	3	2	2	2	2	3	5	3	1	2	0	1	7	4	0	4	2	2	4	0	0	0	0	0	0	0	1
313	0	15			8			2	0					0	1	2	2	3	2	3	2	2	3	5	1	3	1	0	1	0	0	0	0	0	0	0	0	0	0	0	0	0	0	1
218	1	44	0		7		0	3	0					0	1	1	2	2	2	2	3	2	2	5	2	4	1			1	0	2	1	0	0	2	0	0	0	0	0	0	0	1
219	0	49			7		1	3	0					5	0	1	2	2	2	2	3	0	2	5	2	2	1			5	0	2	1	2	1	0	1	1	0	0	0	0	0	1	11	12		0
2014	1	15	0					2	0					0	0	0	5	3	1	1	2	2	2	5	4	3	1	0	2	0	0	0	0	0	2	2	0	0	0	0	0	0	0	0
345	1	15						1	0					0	0	1	1	1	2	2	3	2	0		5	3	3	0		0	0	0	0	0	1	4	0	0	0	0	0	0	0	0
344	1	15						2	0					0	0	1	1	1	2	0	3	2	1	5	3	3	2	0	0	0	0	0	0	0	1	4	0	0	0	0	0	0	0	0
346	0	17						3	0					0	0	1	0	1	2	1	4	3	2	5	1	3	1	0		0	0	0	0	0	1	4	0	0	0	0	0	0	0	0
2015	1	22	0					4	0					5	1	1	3	3	3	2	3	3	1	5	3	5				0	0	0	1	0	0	2	0	0	0	0	0	0	0	1
2057	0	33							1	8	20			5	2	2	3	3	2	4	1	1	0	5	2	3	2	0	1	1	0	0	0	0	0	2	0	0	0	0	0	0	0	0
49	1	37	0					3	1	3				0	0	1	1	1	2	2	4	4	0	5	2	4	0			0	0	0	0	1	1	3	0	1	0	0	0	0	0	1
108	1	61	1	8				1	0					5	0	1	1	2	2	5	1	1	1	5	0	2	0			0	3	0	0	0	0	6	0	0	0	0	0	0	0	1
330	1	63	1	16				1	0					0	4	2	2	2	2	2	2	2	0	5	2	4	1	1	0	1	1	0	5	0	0	0	1	1	0	0	0	0	0	1
3005	1	64							0					0	0	1	1	2	2	2	2	2	0	5	3	3	3	1									1	1	0	0	0	0	0	0	0	16
2041	1	64							0					0																5	0	0	0	0	0	2	1	1	0	1	0	0	0	1	8		12
2012	0	78							0					0	0	1	0	1	0	2	2	0	0	5	1	2	0			0	0	0	0	0	0	0	1	1	0	0	0	0	0	0
232	0	80						0	1	20				0	0	1	2	2	2	2	1	2	0	5	1	2	1			4	0	0	3	0	0	0	1	1	0	0	0	0	0	1	7	8
2018	1	80						1	0					0		2	3	2	3	1	2	3	0	5	0	2	1	1	0	2	0	0	0	0	2	3	1	0	0	0	1	0	0	1	11	8		0
42	1	74	1	20	9	1	0	0						0	0	2	4	3	1	3	1	2	1	5	2	4	1		0	1	5	0	0	5	5	2	1	1	0	0	0	0	0	0	8		18
320	0	58			8	1	1	3						0	0	1	1	1	3	2	2	2	0	5	1	0	0			7	0	0	0	5	7	4	0	0	1	0	0	0	0	0
2002	1	15	0		9	0	1							0	4	1	2	1	2	1	2	3	3	5	3	5	2	0	1	0	0	0	0	0	0	4	0	0	0	0	0	0	0	0
204	0	28												0	0	1	3	1	0	2	3	1	4	5	2	1				0	0	0	1	0	0	0	0	0	0	0	0	0	0	1
69	0	62												0																6	1	3	0	0	3	6	0	0	1	0	0	0	0	0
2046	1	79												0																7	1	0	1	5	0	6	1	1	0	0	0	0	0	1	8		4
2058	0	83												0																5	0	1	0	0	0	3	1	1	0	1	0	0	0	1	15		6		5
[truncated: 44 more columns]
